# Supplementary material
Source: ML conference proceedings conference paper supplement (https://openreview.net/forum?id=Qmw9ne6SOQ)
Supplement: supplementary_material [file attachment]

## A PROBE DATASET DESIGN DETAILS

In this section, we provide detailed descriptions of the probe dataset  $\mathcal{P}$  which is used for causal tracing for both the UNet and the text-encoder. We primarily focus on four visual attributes : *style*, *color*, *objects* and *action*. In addition, we also use the causal tracing framework adapted for text-to-image diffusion models to analyse the *viewpoint* and *count* attribute. The main reason for focusing on *style*, *color*, *objects* and *action* is the fact that generations from current text-to-image models have a strong fidelity to these attributes, whereas the generations corresponding to *viewpoint* or *count* are often error-prone. We generate probe captions for each of the attribute in the following way:

- **Objects.** We select a list of 24 objects and 7 locations (e.g., *beach*, *forest*, *city*, *kitchen*, *mountain*, *park*, *room*) to create a set of 168 unique captions. The objects are : { ‘dog’, ‘cat’, ‘bicycle’, ‘oven’, ‘tv’, ‘bowl’, ‘banana’, ‘bottle’, ‘cup’, ‘fork’, ‘knife’, ‘apple’, ‘sandwich’, ‘pizza’, ‘bed’, ‘tv’, ‘laptop’, ‘microwave’, ‘book’, ‘clock’, ‘vase’, ‘toothbrush’, ‘donut’, ‘handbag’ }. We then use the template: ‘A photo of <object> in <location>.’ to generate multiple captions to probe the text-to-image model. These objects are selected from the list of objects present in MS-COCO.
- **Style.** We select the list of 80 unique objects from MS-COCO and combine it with an artistic style from : { *monet*, *pablo picasso*, *salvador dali*, *van gogh*, *baroque*, *leonardo da vinci*, *micHELANGELO* }. The template used is: ‘A <object> in the style of <artistic-style>’. In total, using this template we generate 560 captions.
- **Color.** We select the list of 80 unique objects from MS-COCO and combine it with a color from { *blue*, *red*, *yellow*, *brown*, *black*, *pink*, *green* }. We then use the template: ‘A <color> <object>’ to generate 560 unique captions to probe the text-to-image model.
- **Action.** We first choose certain actions such as *eating*, *running*, *sitting*, *sprinting* and ask ChatGPT<sup>3</sup> to list a set of animals who can perform these actions. From this list, we choose a set of 14 animals: { *bear*, *cat*, *deer*, *dog*, *giraffe*, *goat*, *horse*, *lion*, *monkey*, *mouse*, *ostrich*, *sheep*, *tiger*, *wolf* }. In total we use the template: ‘An <animal><action>’ to create a set of 56 unique captions for probing.
- **Viewpoint.** For viewpoint, we use the same set of 24 objects from the *Objects* attribute and combine it with a viewpoint selected from { *front*, *back*, *top*, *bottom* } to create 96 captions in the template of: ‘A <object> from the <viewpoint>’.
- **Count.** We use the same 24 objects from *Objects* attribute and introduce a count before the object in the caption. We specifically use the following template to generate captions: ‘A photo of <count> objects in a room.’, where we keep the location fixed. We select a count from {2,4,6,8} to create 96 unique captions in total.

| Attribute | Description                                    | Description of Probe Dataset for Causal Tracing |                                     |                                        |
|-----------|------------------------------------------------|-------------------------------------------------|-------------------------------------|----------------------------------------|
|           |                                                | Example 1                                       | Example 2                           | Example 3                              |
| Objects   | Prompt containing an object in a location      | photo of a <i>vase</i> in a room                | a photo of a <i>car</i> in a desert | a photo of a <i>house</i> in a forest  |
| Style     | An object drawn in a particular artistic style | airplane in the style of <i>van gogh</i>        | town in the style of <i>monet</i>   | bicycle in the style of <i>baroque</i> |
| Color     | An object in a particular color                | a <i>blue</i> car                               | a <i>black</i> vase                 | a <i>pink</i> bag                      |
| Action    | An animal in a particular action               | A giraffe <i>eating</i>                         | A tiger <i>running</i>              | A cat <i>standing</i>                  |
| Viewpoint | An object in a particular viewpoint            | A sofa from the <i>back</i>                     | A car from the <i>front</i>         | A bus from the <i>side</i>             |
| Count     | Number of objects in a location                | There are <i>10</i> cars on the road            | <i>5</i> bags in the room           | <i>6</i> laptops on a table            |

Table 1: **Examples from the Probe Dataset Used For Causal Tracing.** The attributes in the captions are marked in *italics*.

<sup>3</sup>We use version 3.5 for ChatGPT.

## B QUALITATIVE VISUALIZATIONS FOR CAUSAL TRACING (UNET)

### B.1 OBJECTS

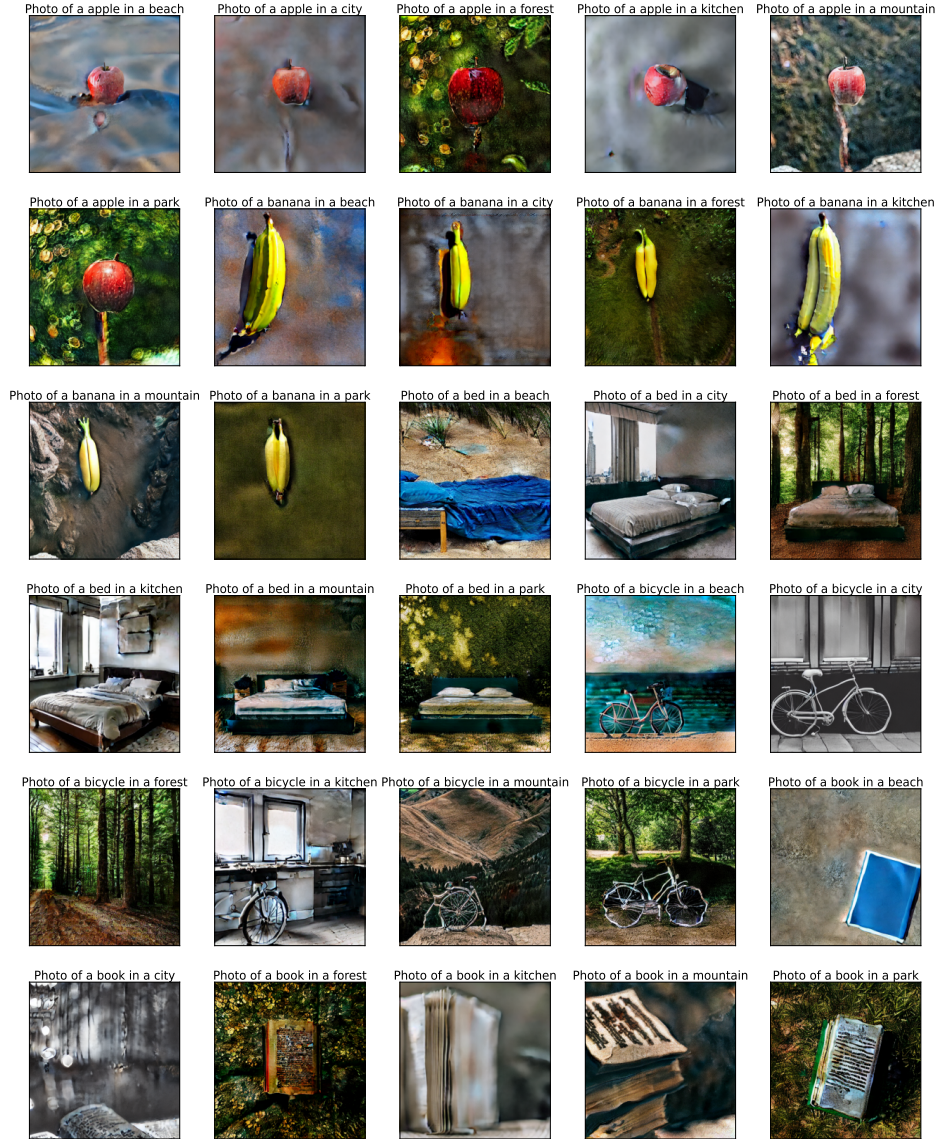

Figure 6: **Causal State: down-1-resnet-1.** We find that restoring the down-1-resnet-1 block in the UNet leads to generation of images with strong fidelity to the original caption.



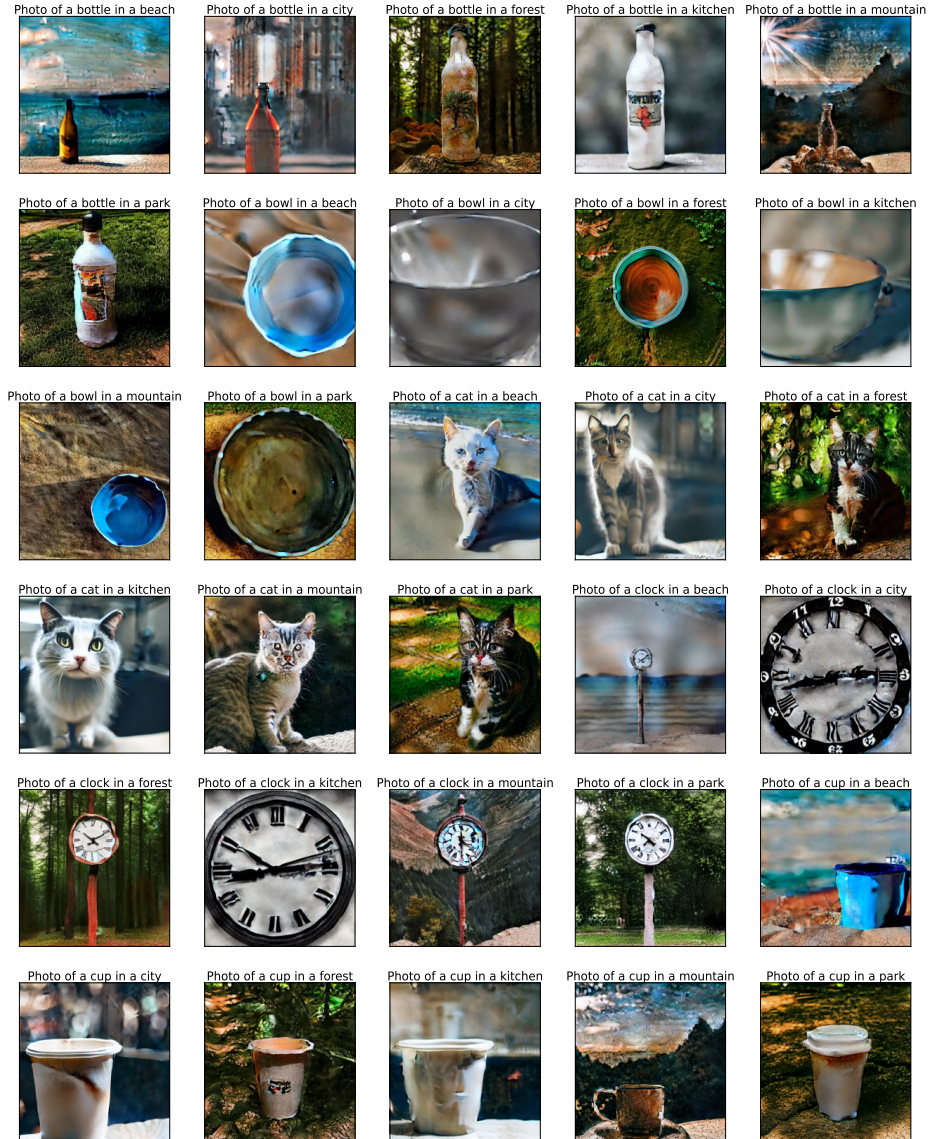

Figure 7: **Causal State: down-1-resnet-1.** We find that restoring the down-1-resnet-1 block in the UNet leads to generation of images with strong fidelity to the original caption.

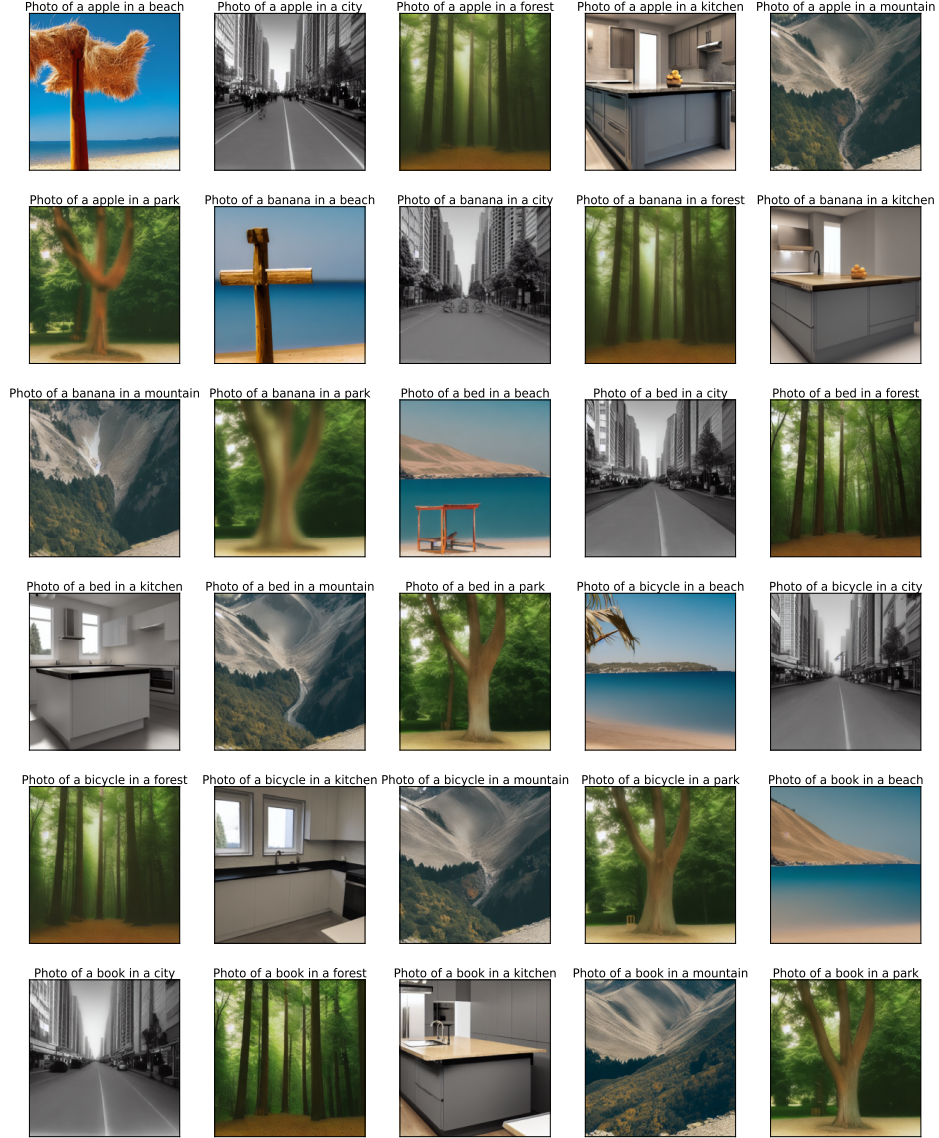

Figure 8: **Non-Causal State: down-blocks.0.attentions.0.transformer-blocks.0.attn2.** We find that restoring the down-blocks.0.attentions.0.transformer-blocks.0.attn2 block in the UNet leads to generation of images **without** the primary object, showing low fidelity to the original captions.

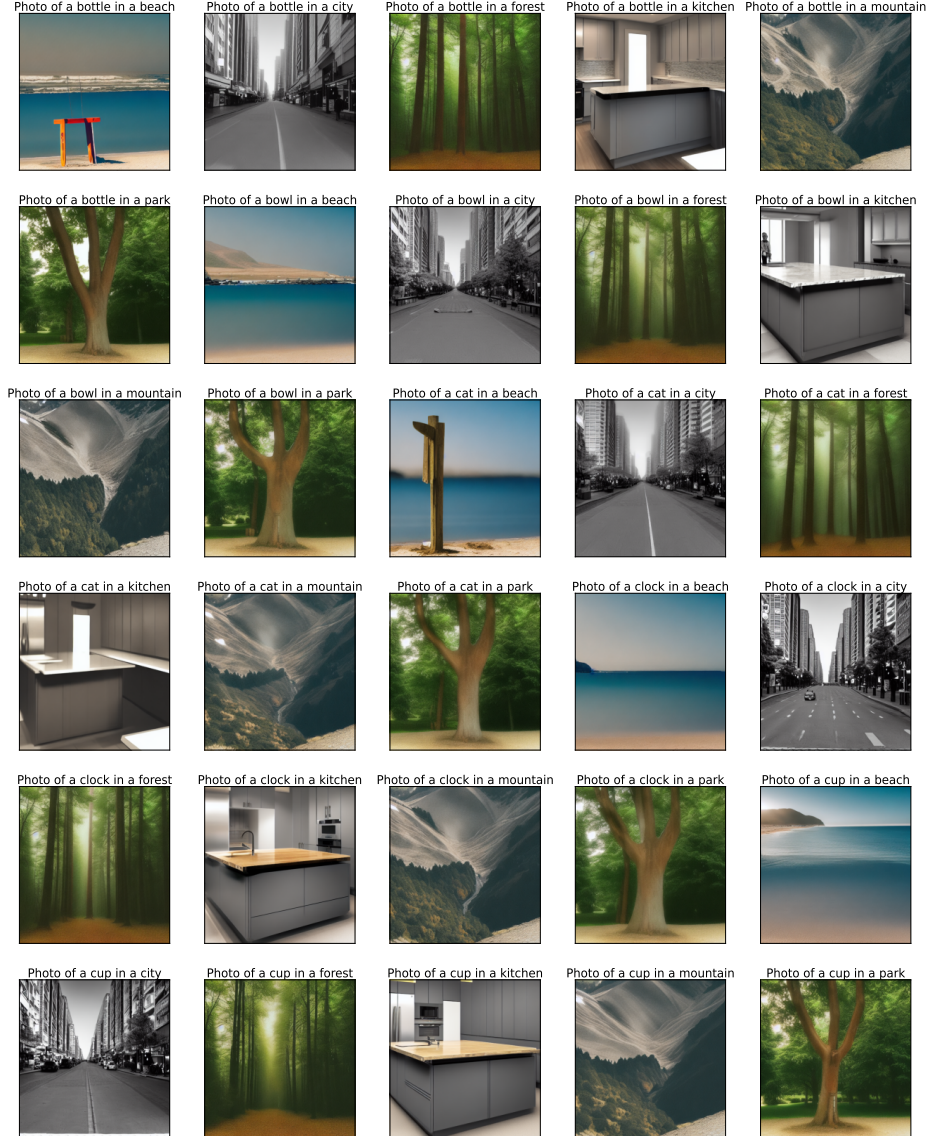

Figure 9: **Non-Causal State: down-blocks.0.attentions.0.transformer-blocks.0.attn2.** We find that restoring the down-blocks.0.attentions.0.transformer-blocks.0.attn2 block in the UNet leads to generation of images **without** the primary object, showing low fidelity to the original captions.



## B.2 ACTION

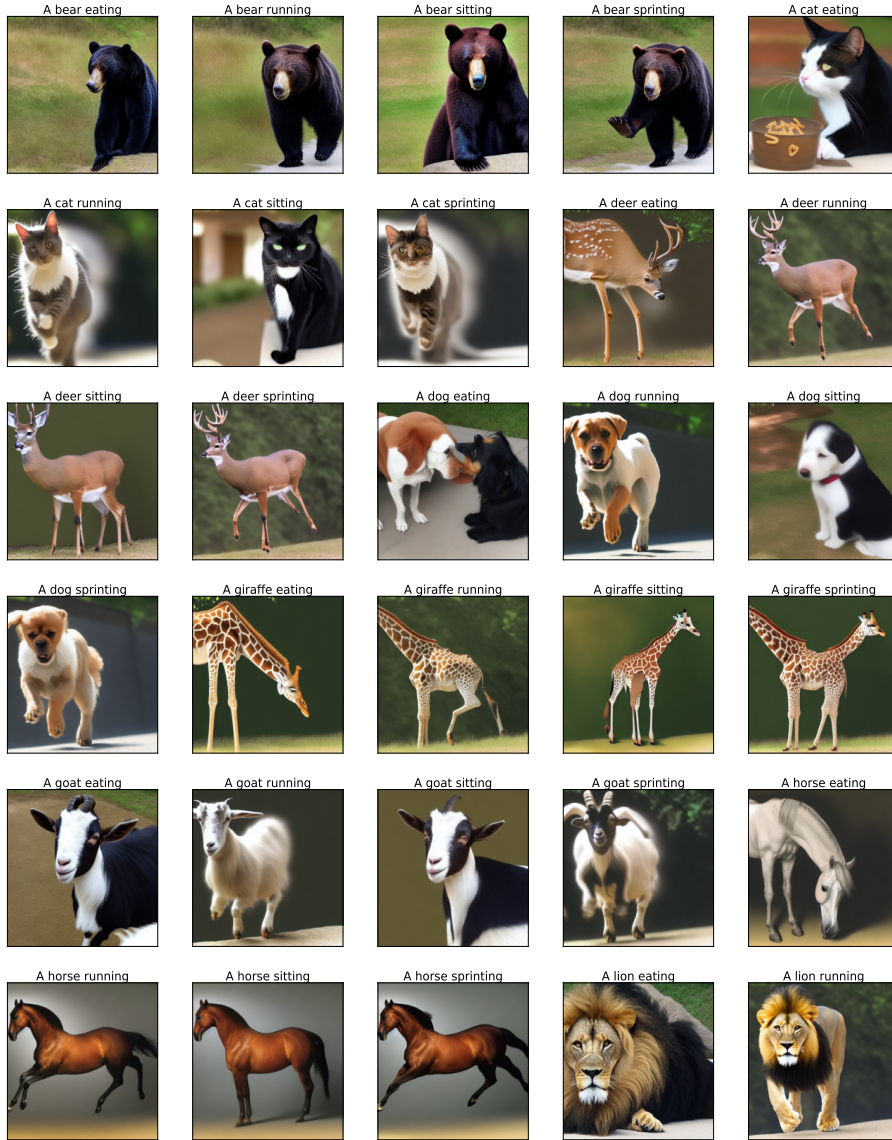

Figure 10: **Causal State: mid-block-cross-attn.** We find that restoring the cross-attn in the mid-block in the UNet leads to generation of images with strong fidelity to the *action* attribute in the original caption.



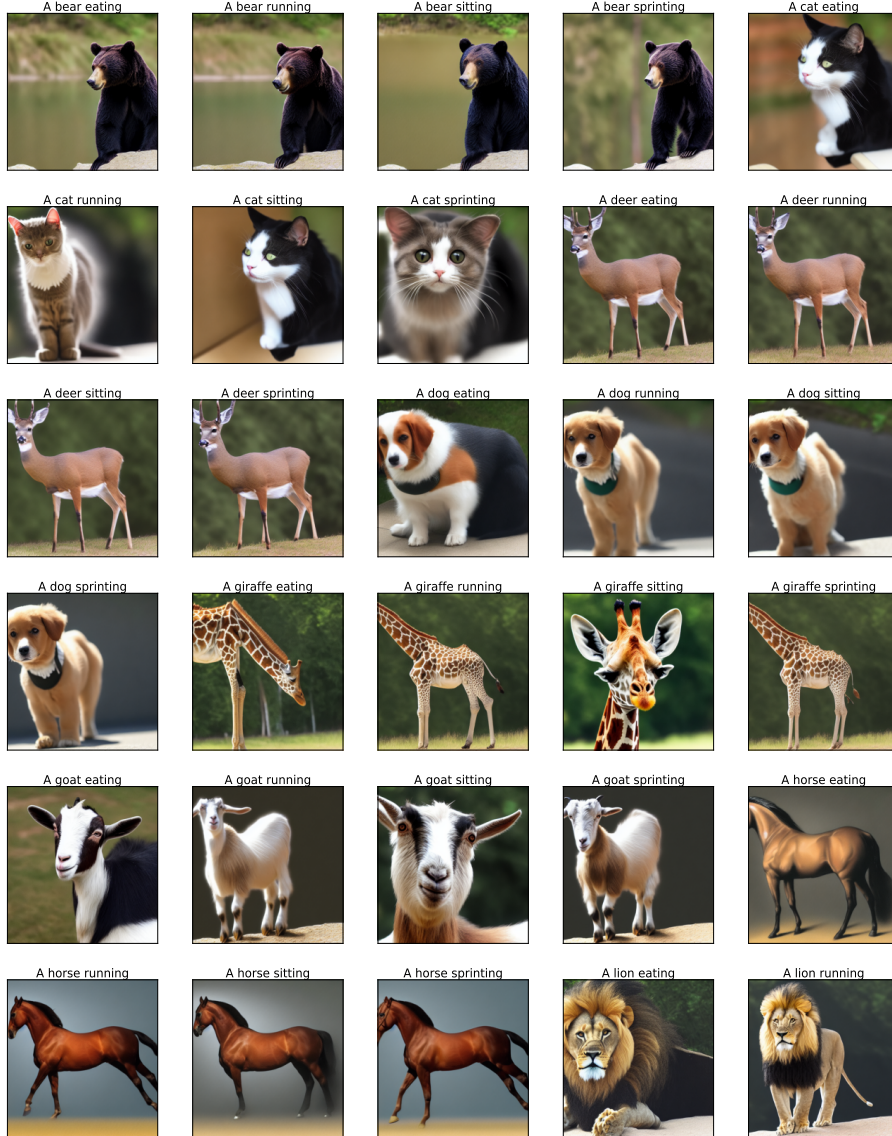

Figure 11: **Non-Causal State: down-blocks.2.attentions.1.transformer-blocks.0.attn2.** We find that restoring the down-blocks.2.attentions.1.transformer-blocks.0.attn2 in the UNet leads to generation of images with weak fidelity to the *action* attribute in the original caption. For a majority of the prompts, we find that the *action* attribute (especially those involving sprinting, running or eating) is not respected in the generated image.

## B.3 COLOR

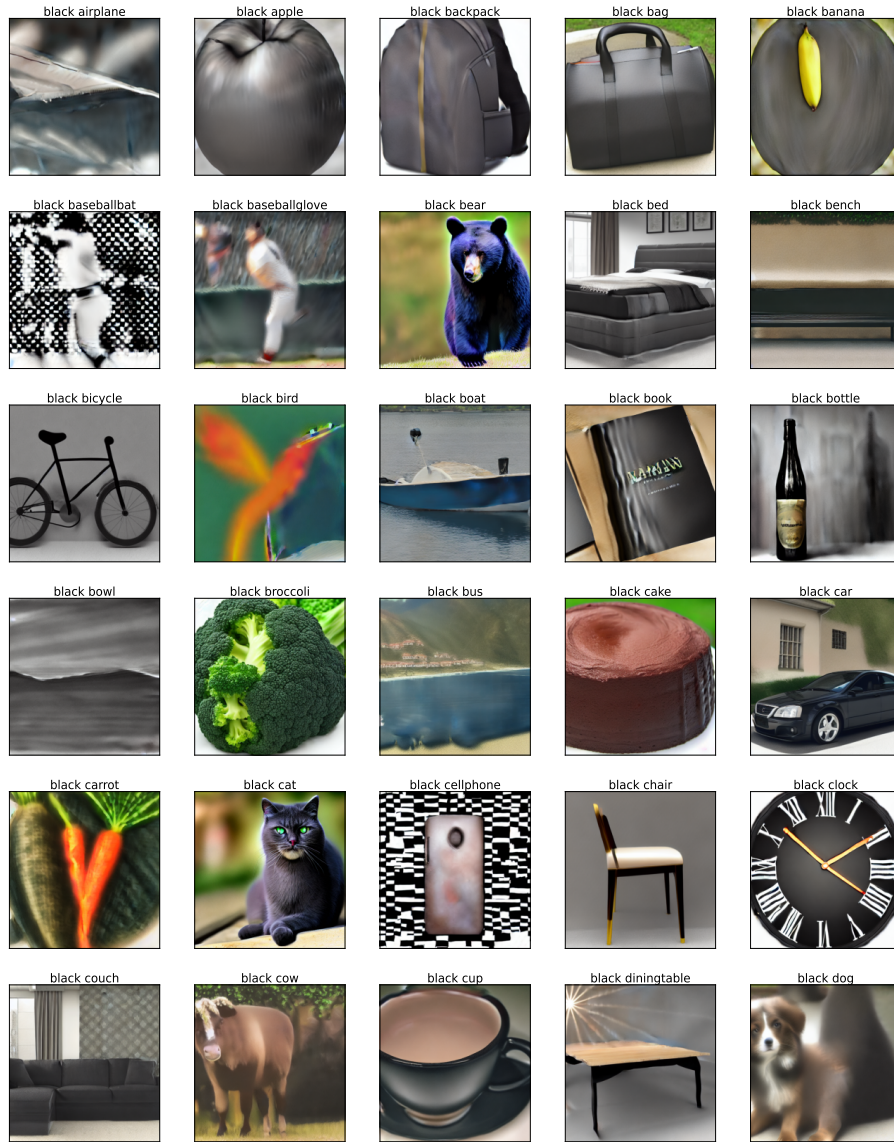

Figure 12: **Causal State: down-blocks.1.attentions.0.transformer-blocks.0.ff.** We find that restoring the down-blocks.1.attentions.0.transformer-blocks.0.ff in the down-block in the UNet leads to generation of images with strong fidelity to the *color* attribute in the original caption.

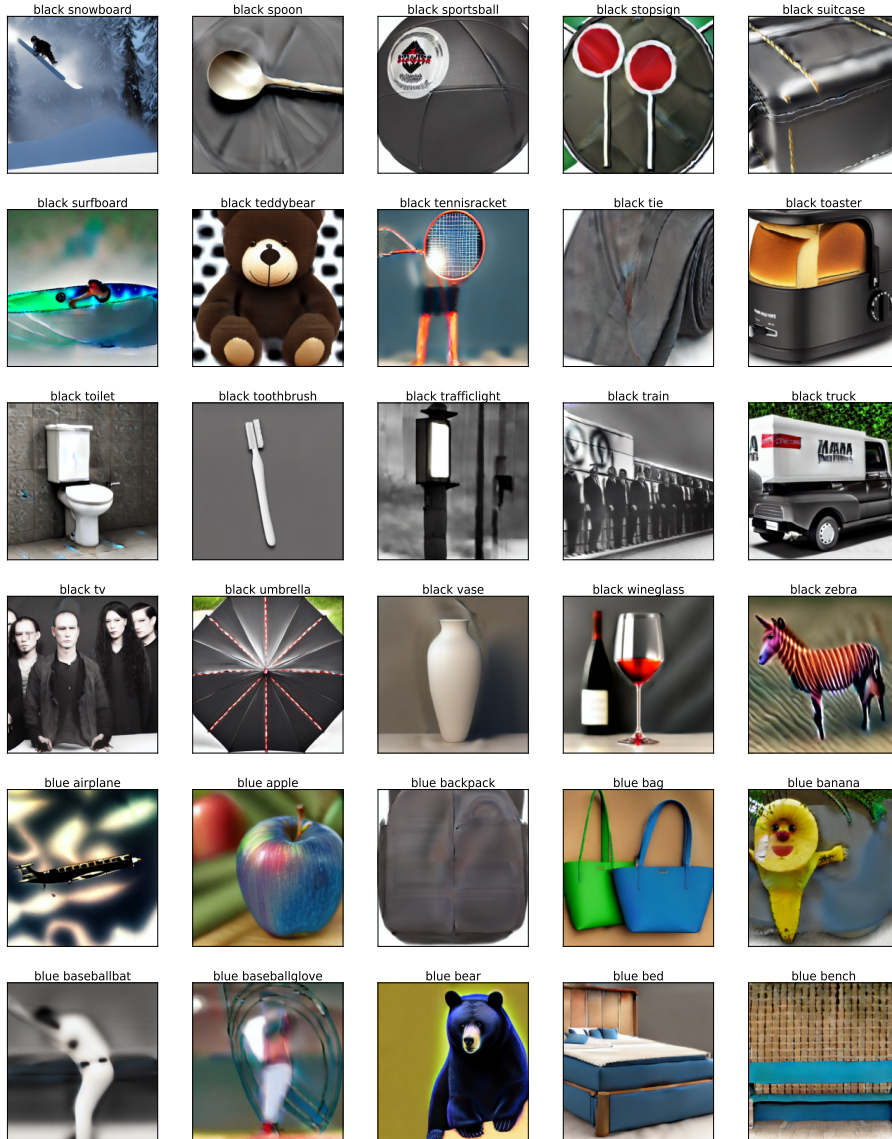

Figure 13: **Causal State: down-blocks.1.attentions.0.transformer-blocks.0.ff.** We find that restoring the down-blocks.1.attentions.0.transformer-blocks.0.ff in the down-block in the UNet leads to generation of images with strong fidelity to the *color* attribute in the original caption.



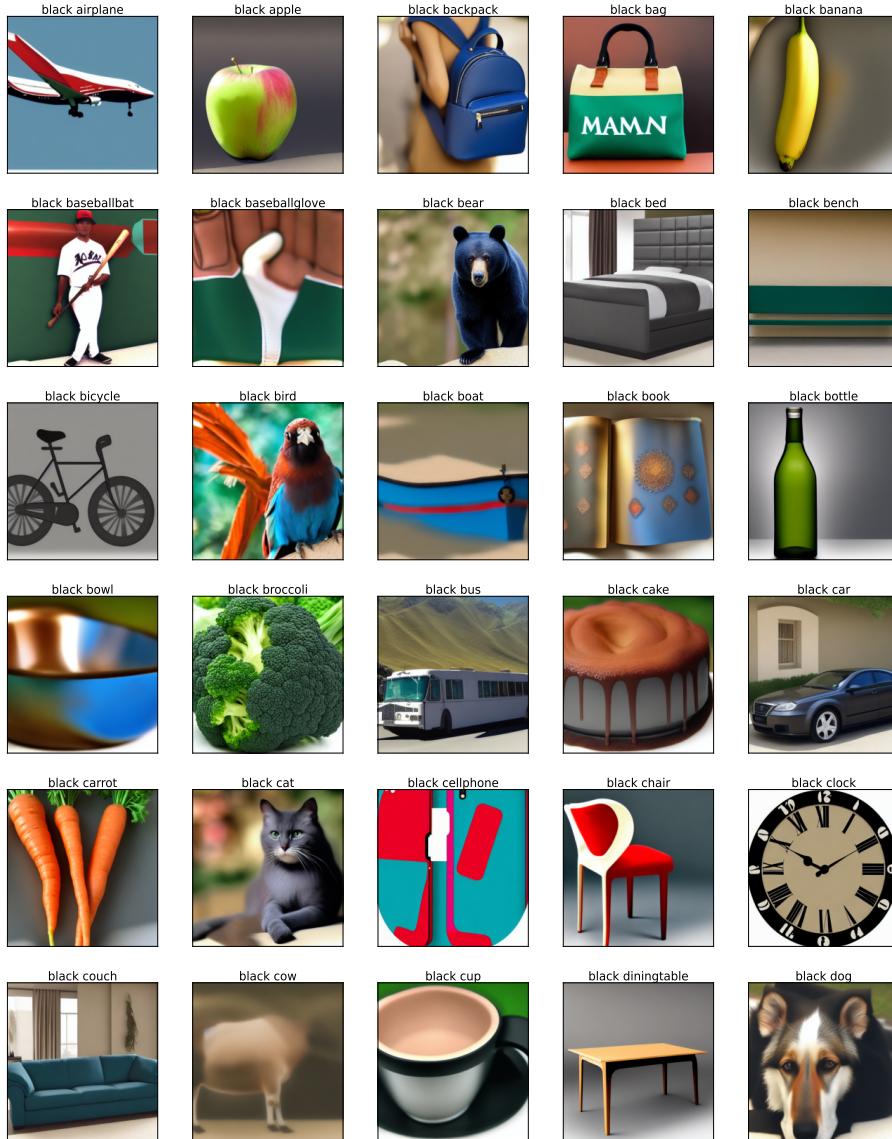

Figure 14: **Non-Causal State: mid-blocks.attentions.0.transformer-blocks.0.ff.** We find that restoring the mid-blocks.attentions.0.transformer-blocks.0.ff in the mid-block in the UNet does not lead to generation of images with strong fidelity to the *color* attribute in the original caption for a majority of cases.



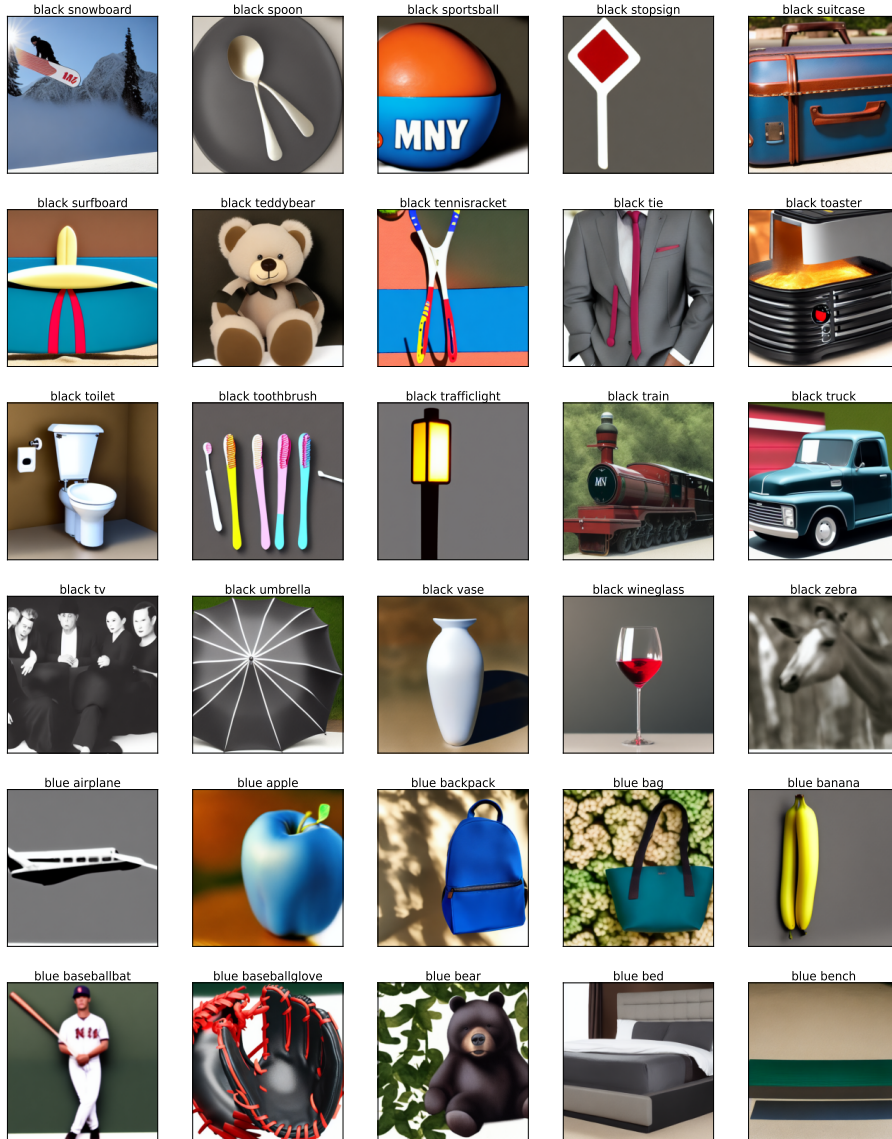

Figure 15: **Non-Causal State: mid-blocks.attentions.0.transformer-blocks.0.ff.** We find that restoring the down-mid-blocks.attentions.0.transformer-blocks.0.ff in the mid-block in the UNet does not lead to generation of images with strong fidelity to the *color* attribute in the original caption for a majority of cases.

## B.4 STYLE

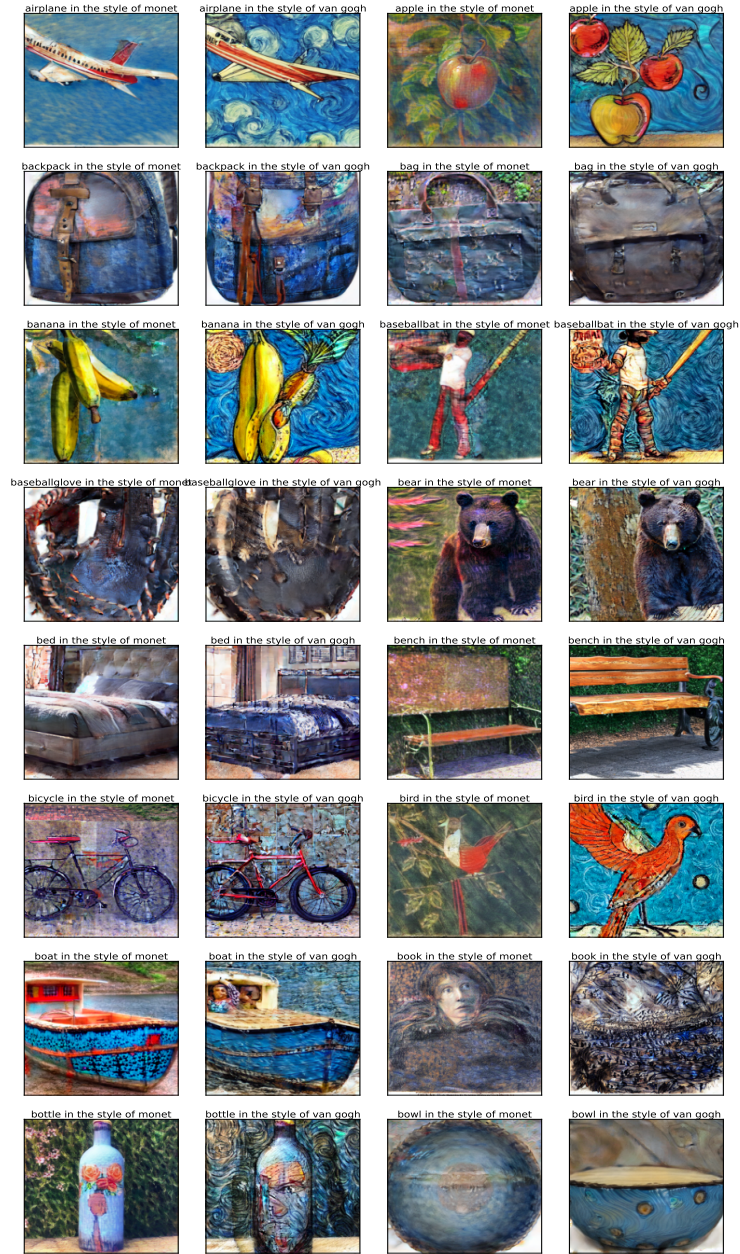

Figure 16: **Causal State: down-blocks.0.attn1 (First self-attn layer).** We find that restoring the down-blocks.self-attn.0 which is the first self-attention layer in the UNet **leads** to generation of images with strong fidelity to the *style* attribute in the original caption for a majority of cases.

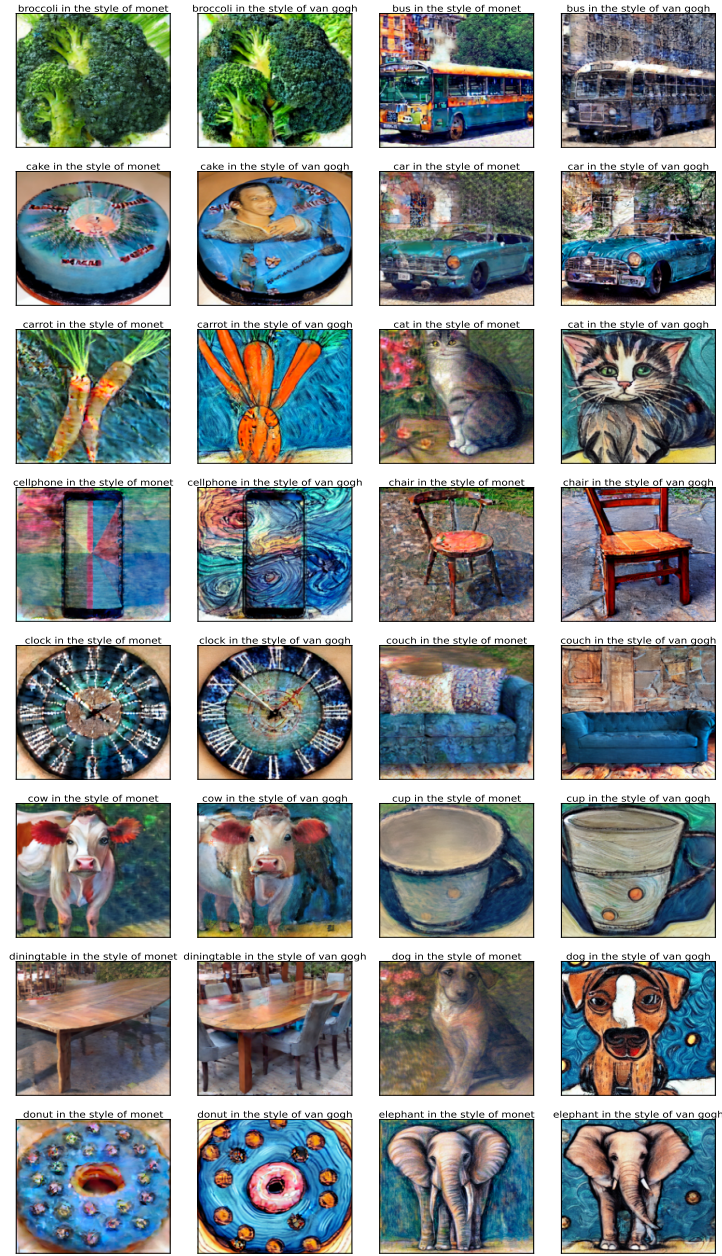

Figure 17: **Causal State: down-blocks.0.attn1.** We find that restoring the down-blocks.self-attn.0 which is the first self-attention layer in the UNet **leads** to generation of images with strong fidelity to the *style* attribute in the original caption for a majority of cases.



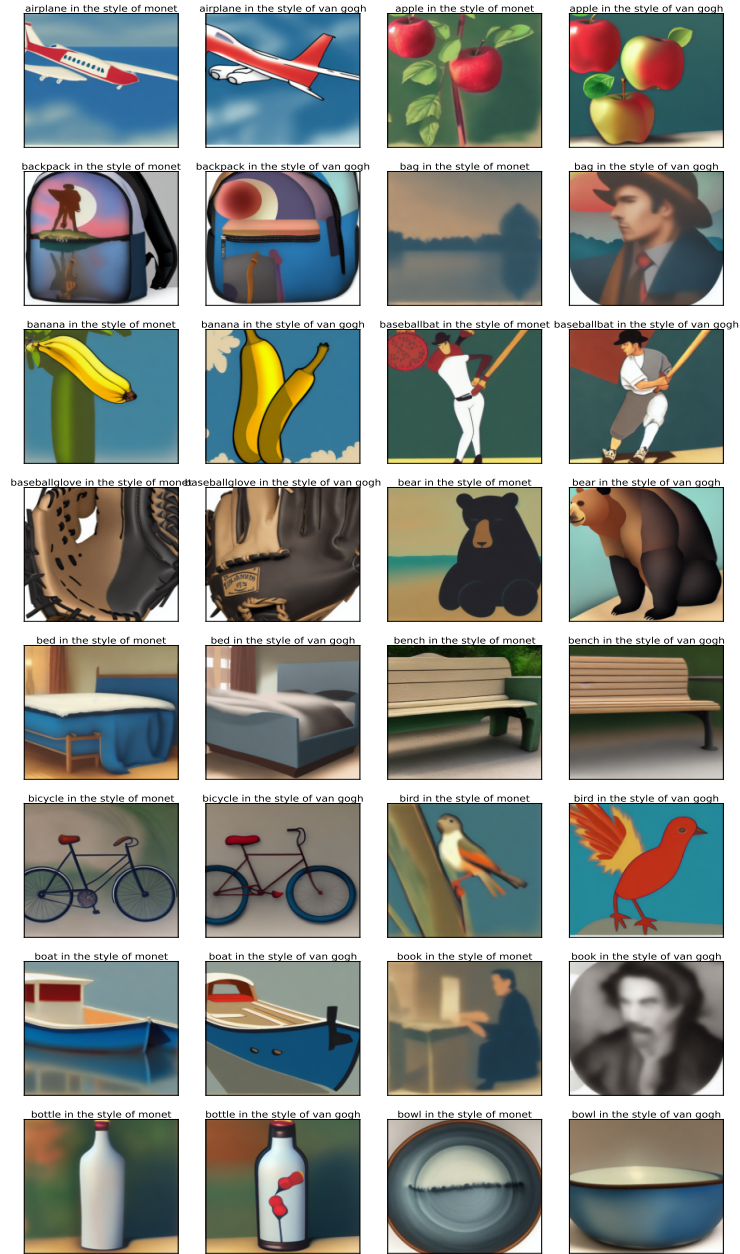

Figure 18: **Non-Causal State: down-blocks.2.attentions.1.transformer-blocks.0.attn2** We find that restoring the down-blocks.2.attentions.1.transformer-blocks.0.attn2 in the UNet **does not** lead to generation of images with strong fidelity to the *style* attribute in the original caption for a majority of cases.



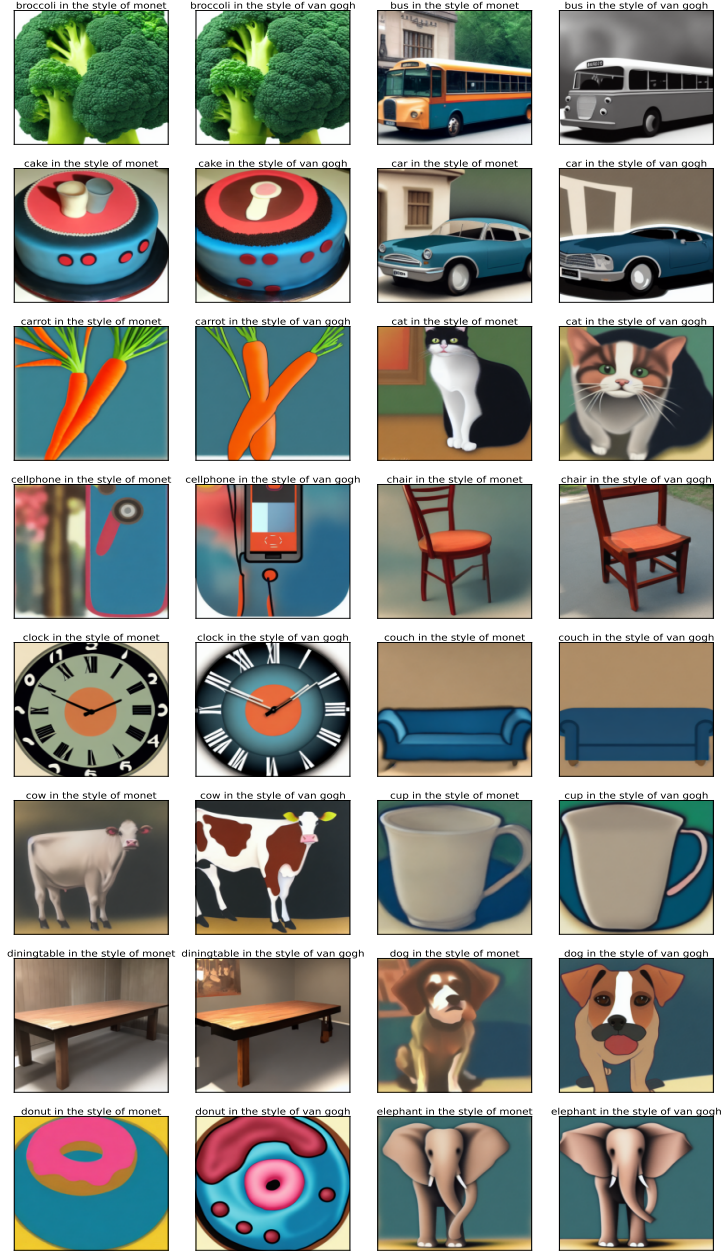

Figure 19: **Non-Causal State: down-blocks.2.attentions.1.transformer-blocks.0.attn2.** We find that restoring the down-blocks.2.attentions.1.transformer-blocks.0.attn2 which is the first self-attention layer in the UNet **does not** lead to generation of images with strong fidelity to the *style* attribute in the original caption for a majority of cases.

## C QUALITATIVE VISUALIZATIONS FOR CAUSAL TRACING (TEXT-ENCODER)

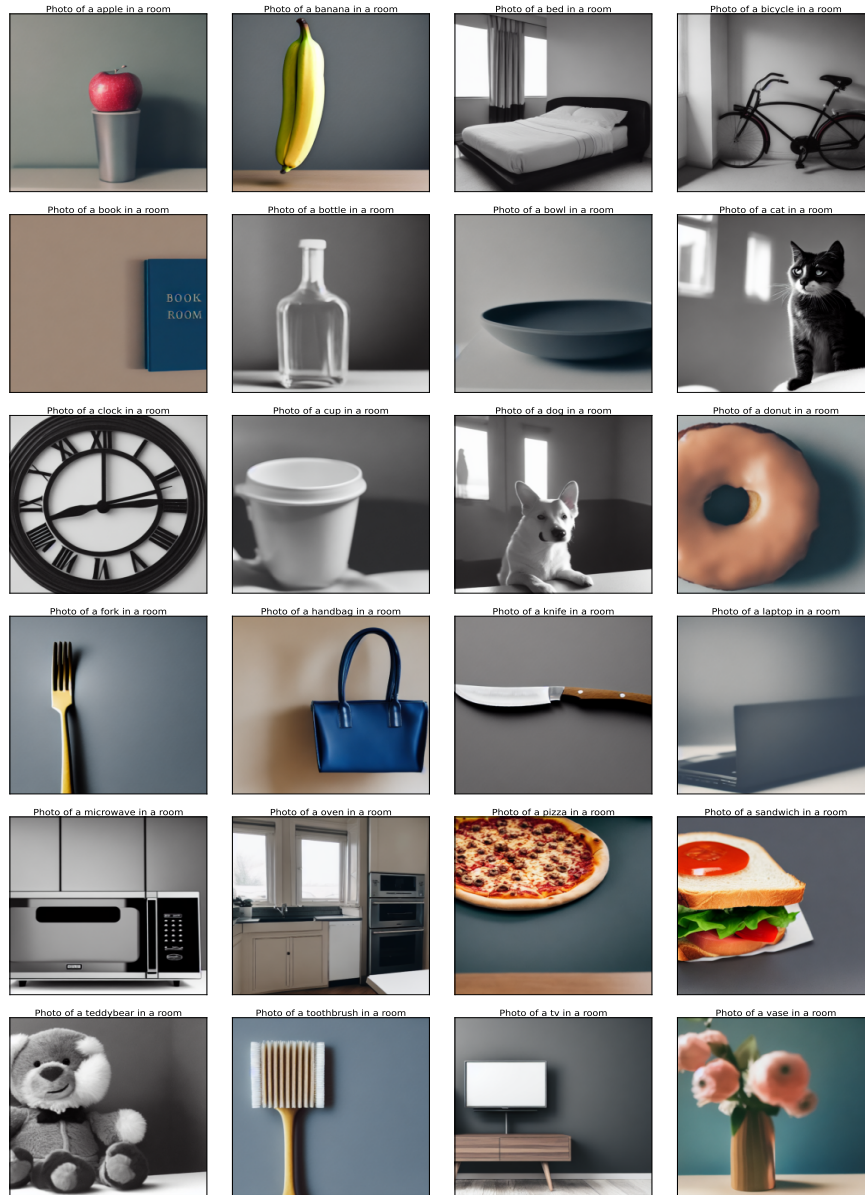

Figure 20: **Causal State: self-attn-0 corresponding to the last subject token.** We find that restoring the first self-attn layer which is the first self-attention layer in the text-encoder leads to generation of images with strong fidelity to the original caption for a majority of cases.

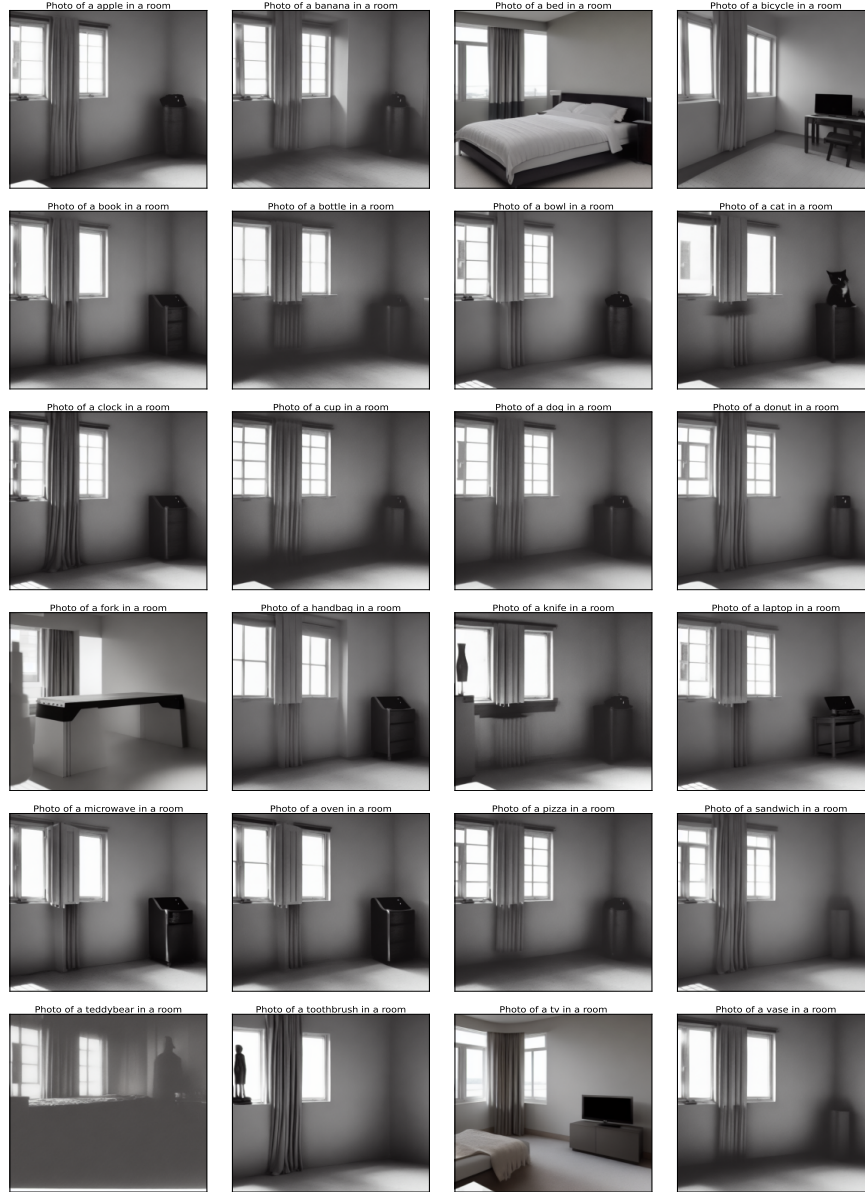

Figure 21: **Non-Causal State: self-attn-4 corresponding to the last subject token.** We find that restoring the fourth self-attn layer in the text-encoder **does not lead** to generation of images with strong fidelity to the original caption for a majority of cases.

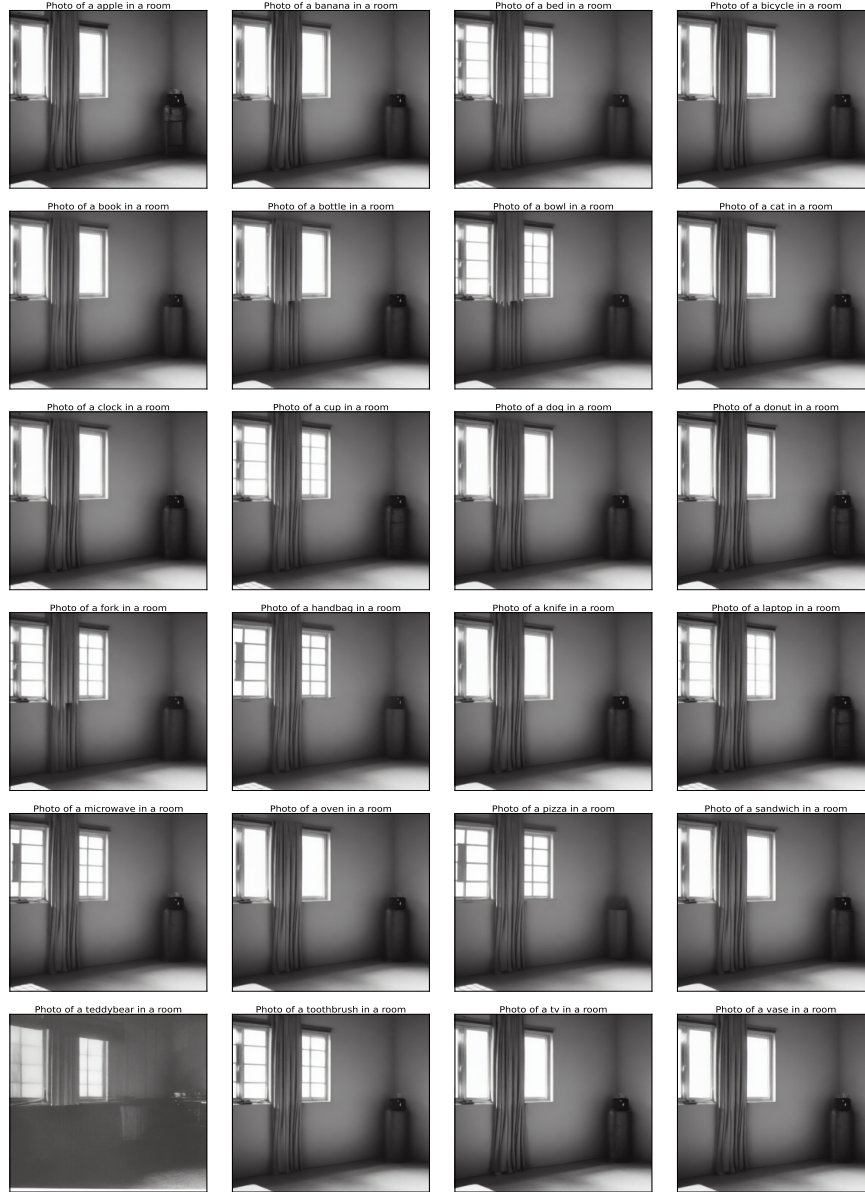

Figure 22: **Non-Causal State: self-attn-5 corresponding to the last subject token.** We find that restoring the fifth self-attn layer in the text-encoder **does not lead** to generation of images with strong fidelity to the original caption for a majority of cases.

## D VALIDATION-SET DESIGN FOR CAUSAL TRACING

To select the threshold for `CLIP-Score` to be used at scale across the entirety of prompts (as shown in Appendix A), we use a small validation set of 10 prompts per attribute. In particular,



we build a Jupyter notebook interface to select causal states for them. Once the causal states are marked, we select the common causal states across all the 10 prompts per attribute. Per causal state, we then compute the average CLIP-Score across the 10 prompts per attribute. Per attribute, we then select the lowest CLIP-Score corresponding to a causal state. These sets of CLIP-Scores per attribute is then used to filter the causal states and the non-causal states from the larger set of prompts in the probe dataset used in Appendix A.

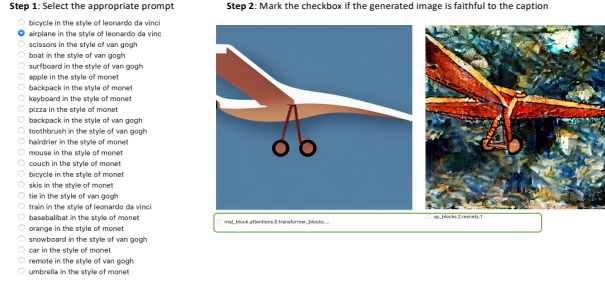

Figure 23: Jupyter Notebook Interface for Marking Causal States.

## E CAUSAL TRACING FOR VIEWPOINT AND COUNT

In this section, we provide additional causal tracing results for the *viewpoint* and *count* attribute.

### E.1 VIEWPOINT

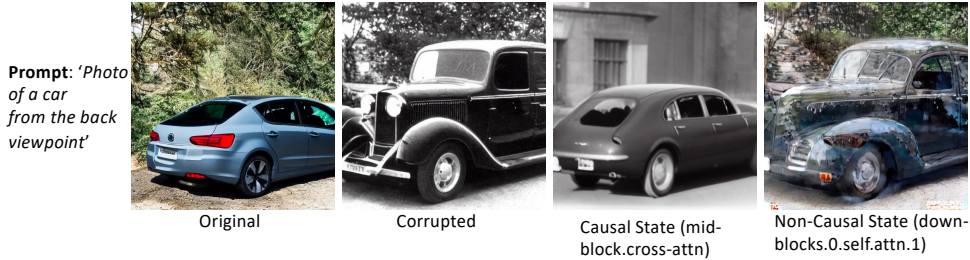

Figure 24: Illustration of a causal state for the viewpoint attribute.

### E.2 COUNT

For the *count* attribute, we find that public text-to-image generative models such as Stable-Diffusion cannot generate images with high-fidelity to the captions. Therefore, we do not use causal tracing for this attribute.

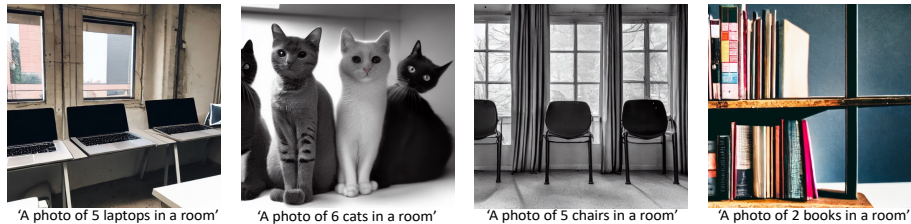

Figure 25: Illustration of failure cases of generation for the *count* attribute with the Original Clean model.

## F QUALITATIVE VISUALIZATIONS USING DIFF-QUICKFIX FOR ABLATING CONCEPTS

### F.1 ABLATING ARTISTIC STYLES

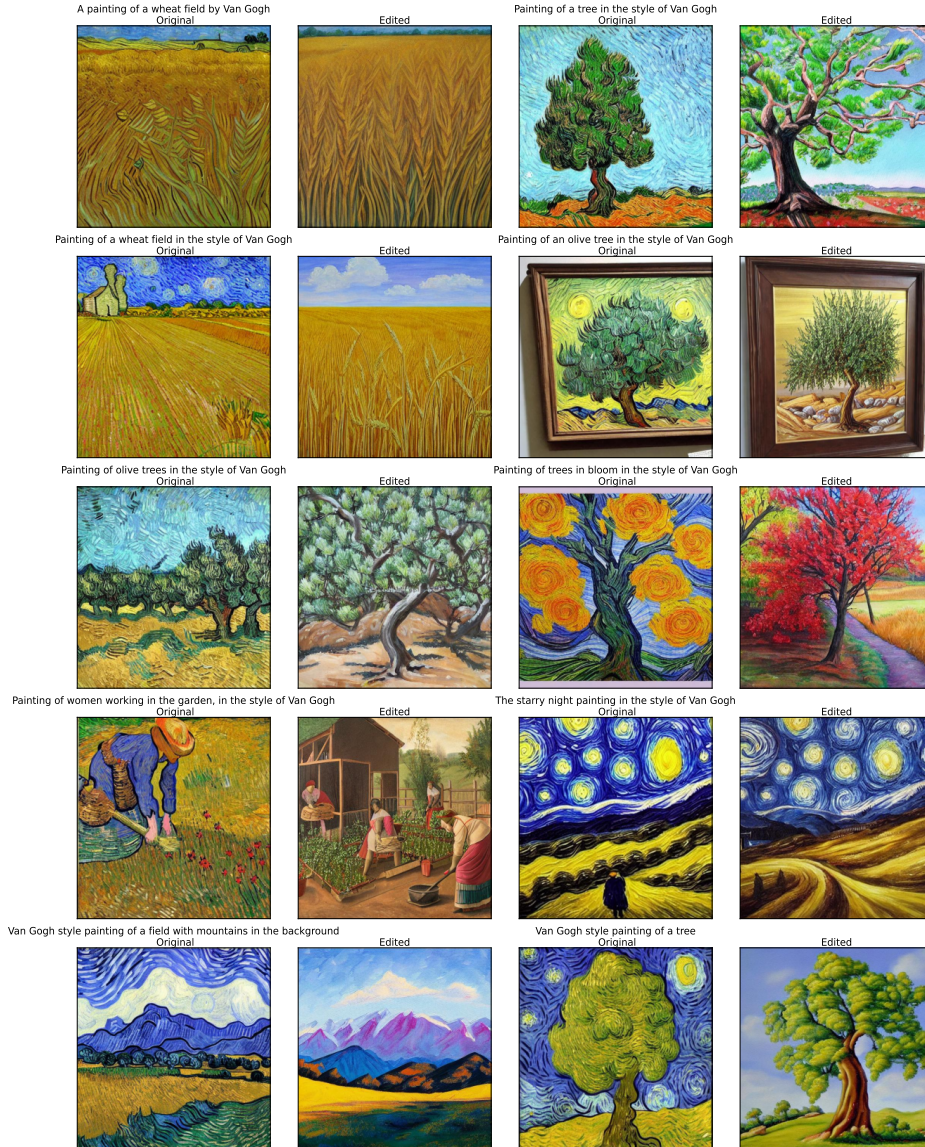

Figure 26: **Single-Concept Ablated Model: Generations with different *Van Gogh* Prompts.**



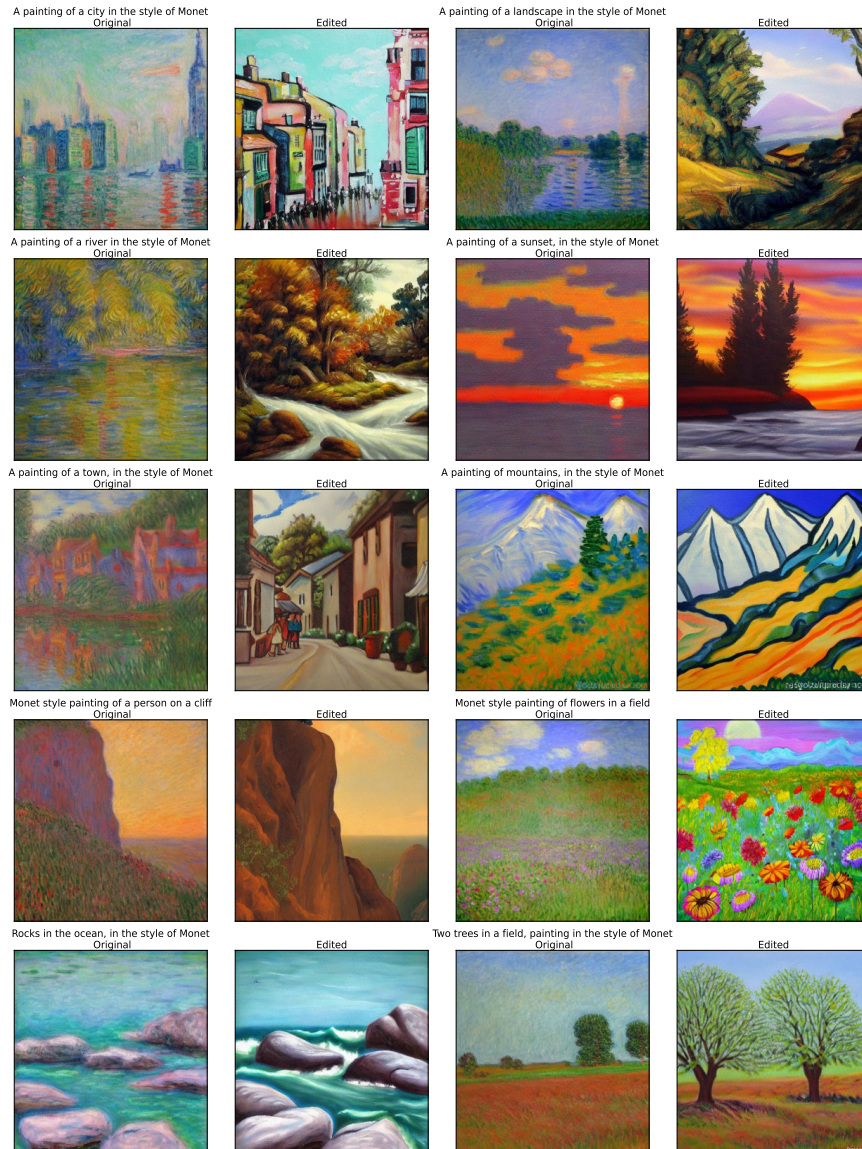

Figure 27: **Single-Concept Ablated Model: Generations with different *Monet* Prompts.**



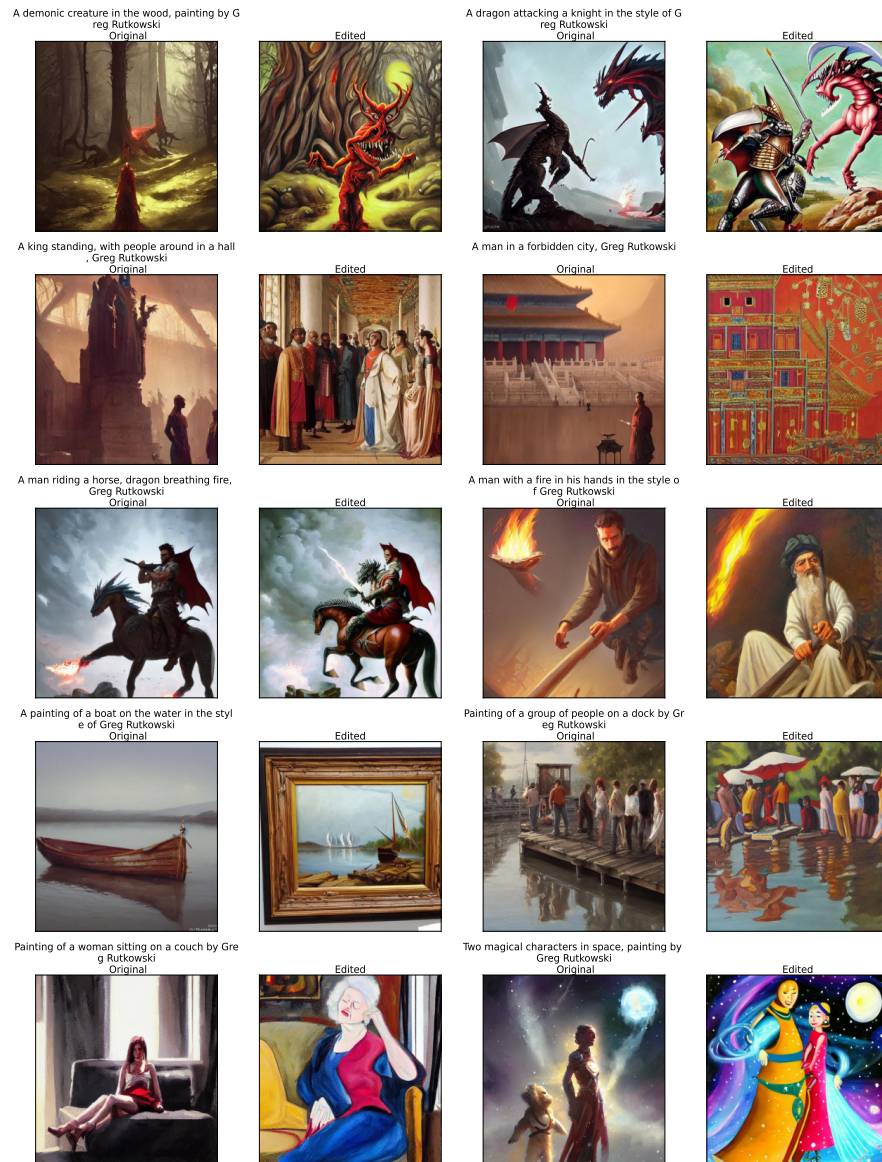

Figure 28: **Single-Concept Ablated Model: Generations with different *Greg Rutkowski* Prompts.**

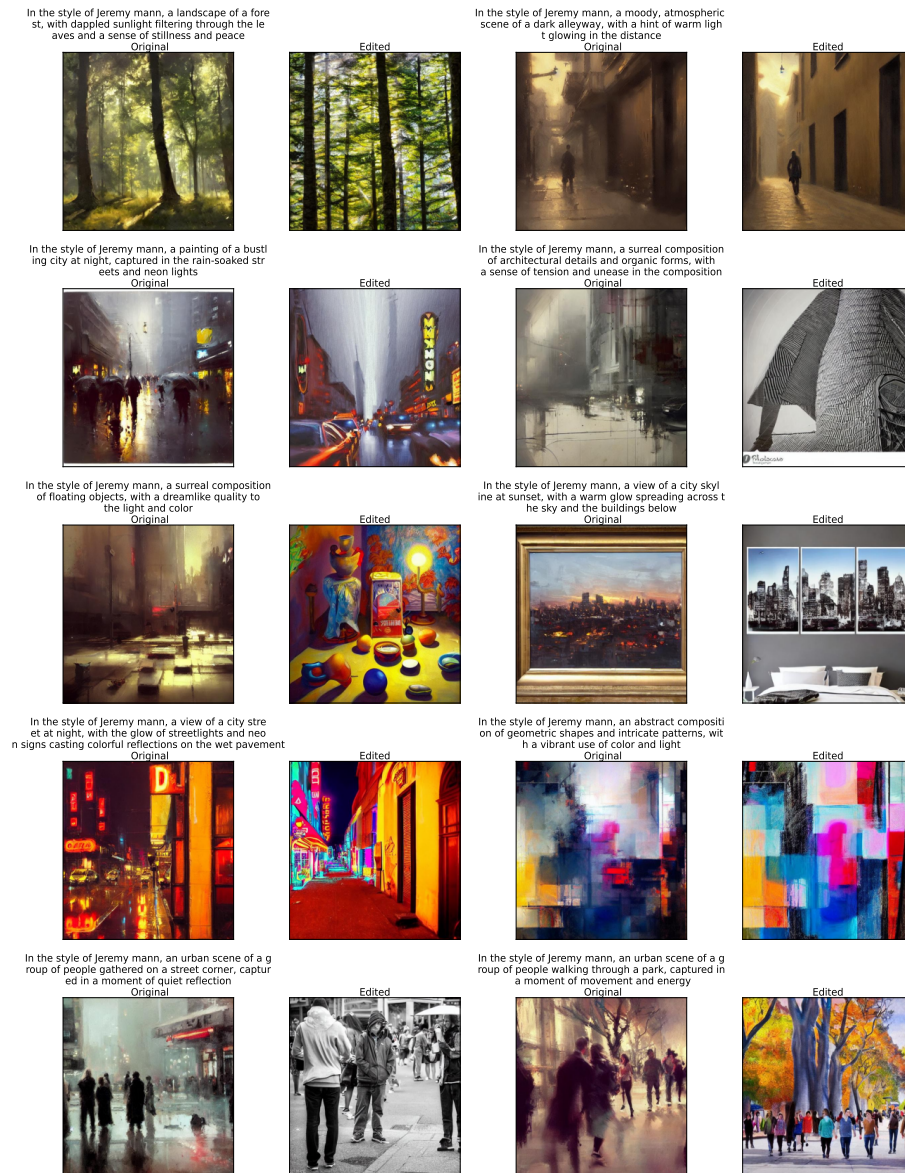

Figure 29: **Single-Concept Ablated Model: Generations with different *Jeremy Mann* Prompts.**

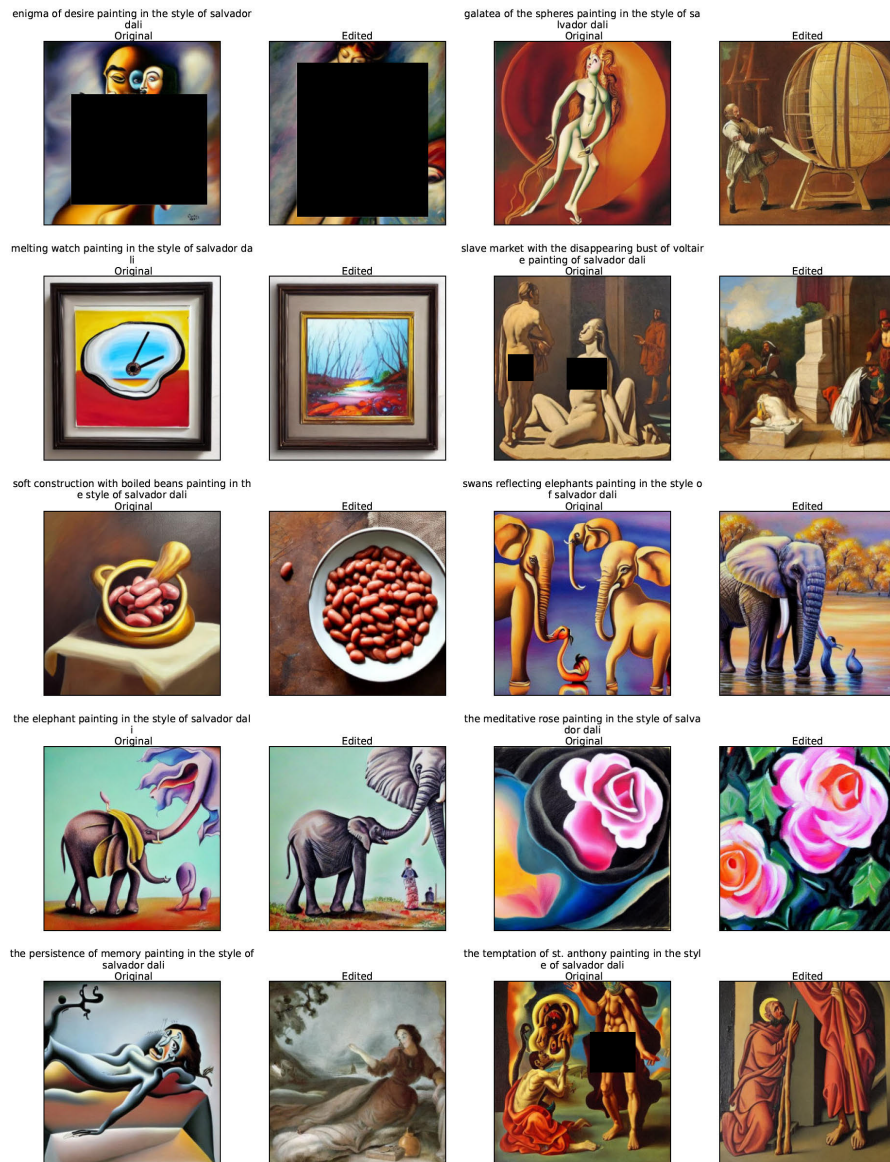

Figure 30: **Single-Concept Ablated Model: Generations with different *Salvador Dali* Prompts.**



## F.2 ABLATING OBJECTS

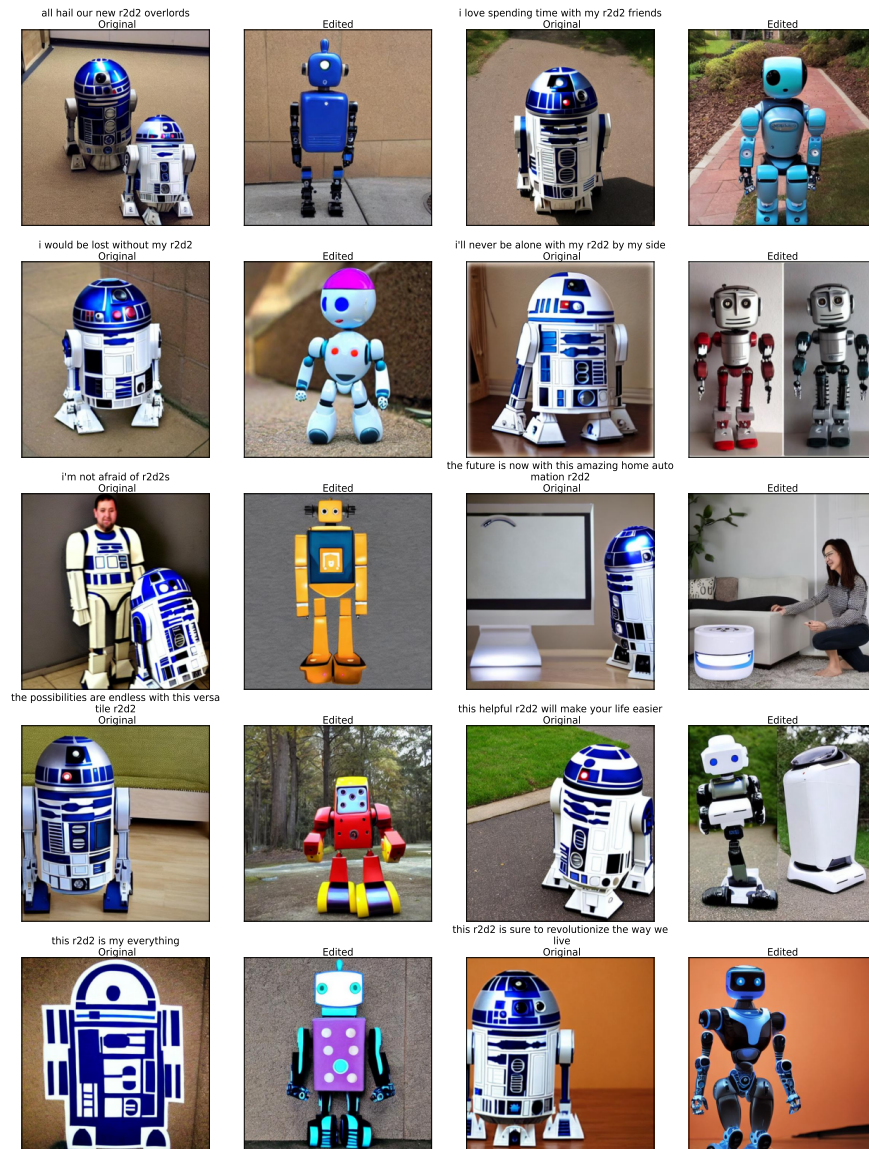

Figure 31: **Single-Concept Ablated Model: Generations with different R2D2 Prompts.**

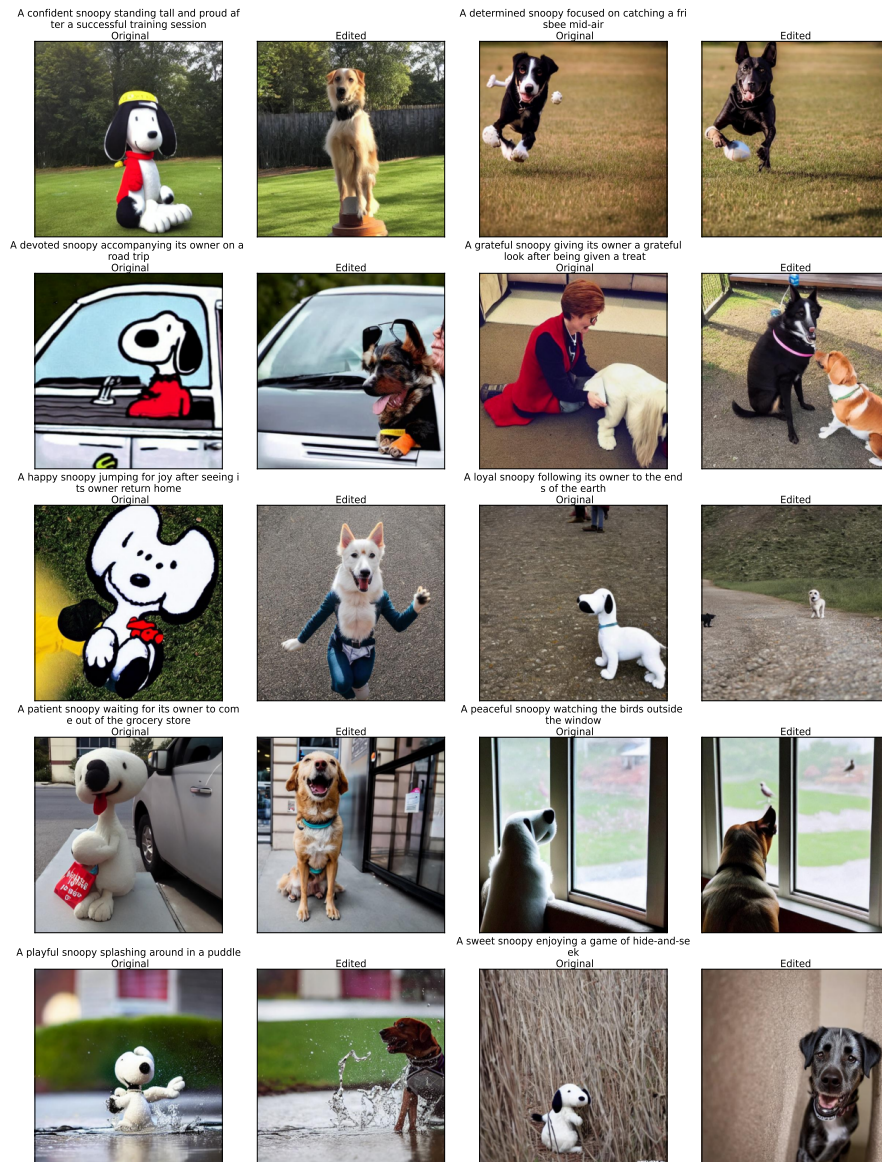

Figure 32: **Single-Concept Ablated Model: Generations with different *Snoopy* Prompts.**

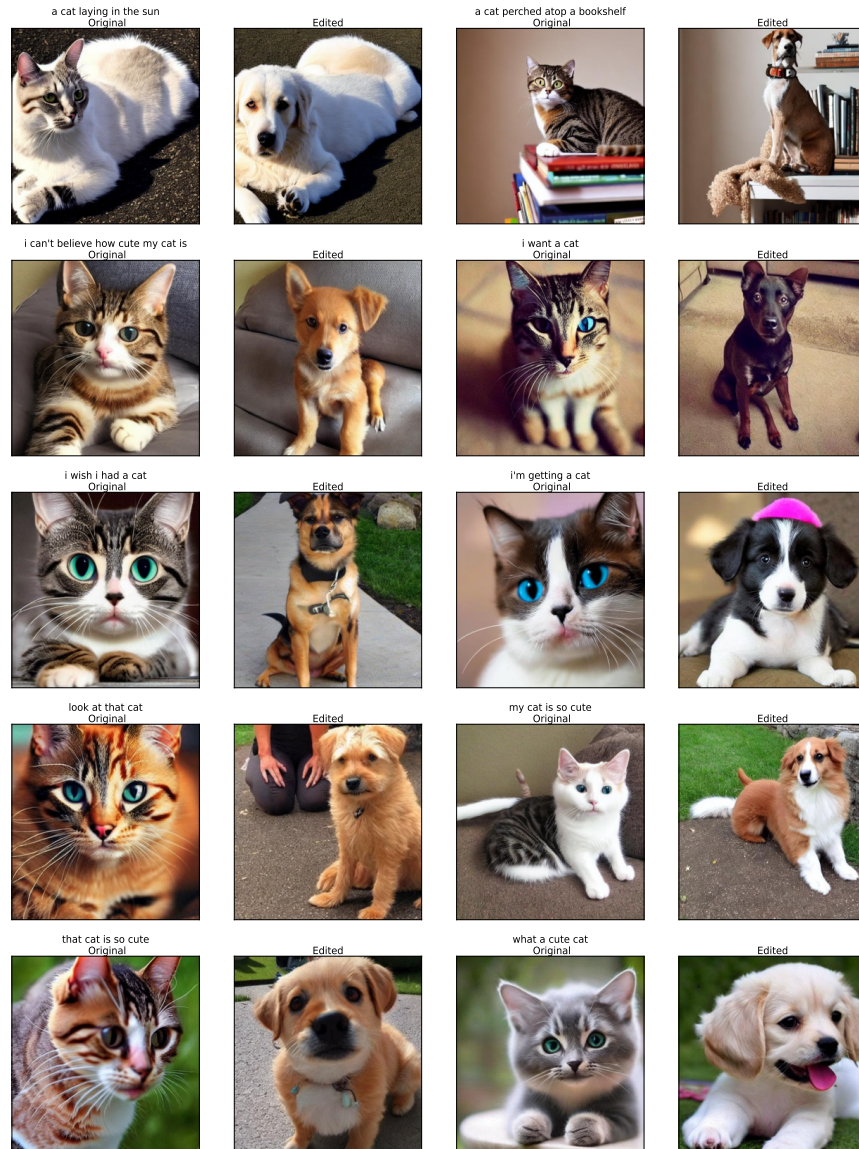

Figure 33: **Single-Concept Ablated Model: Generations with different *Cat* Prompts.**



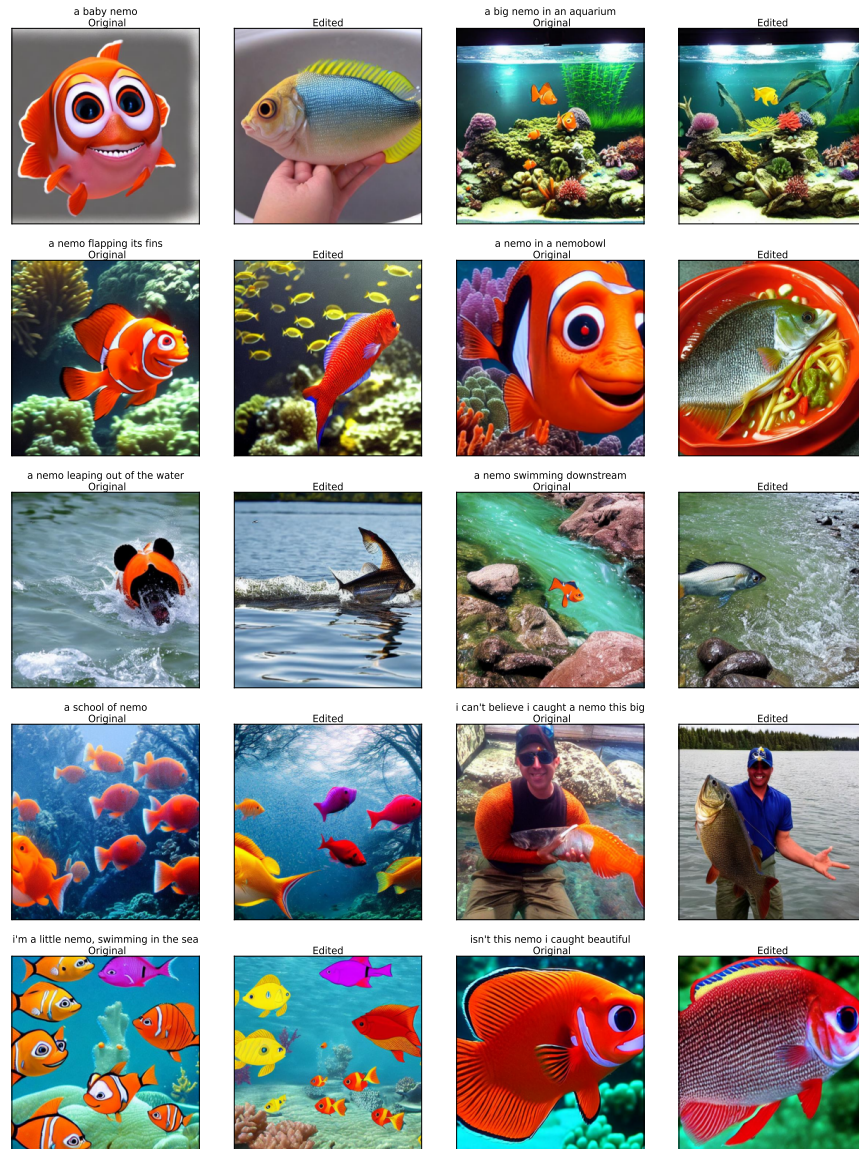

Figure 34: **Single-Concept Ablated Model: Generations with different *Nemo* Prompts.**

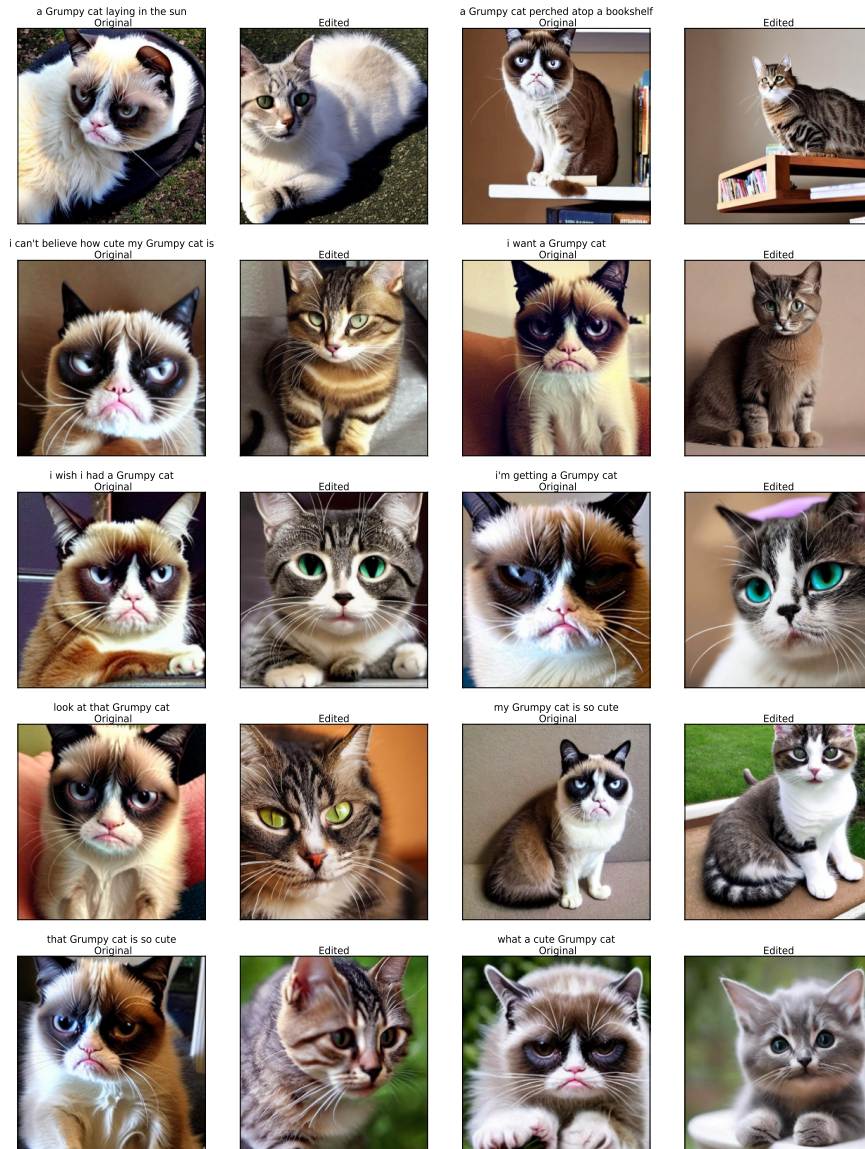

Figure 35: **Single-Concept Ablated Model: Generations with different *Grumpy Cat* Prompts.**



### F.3 UPDATING FACTS

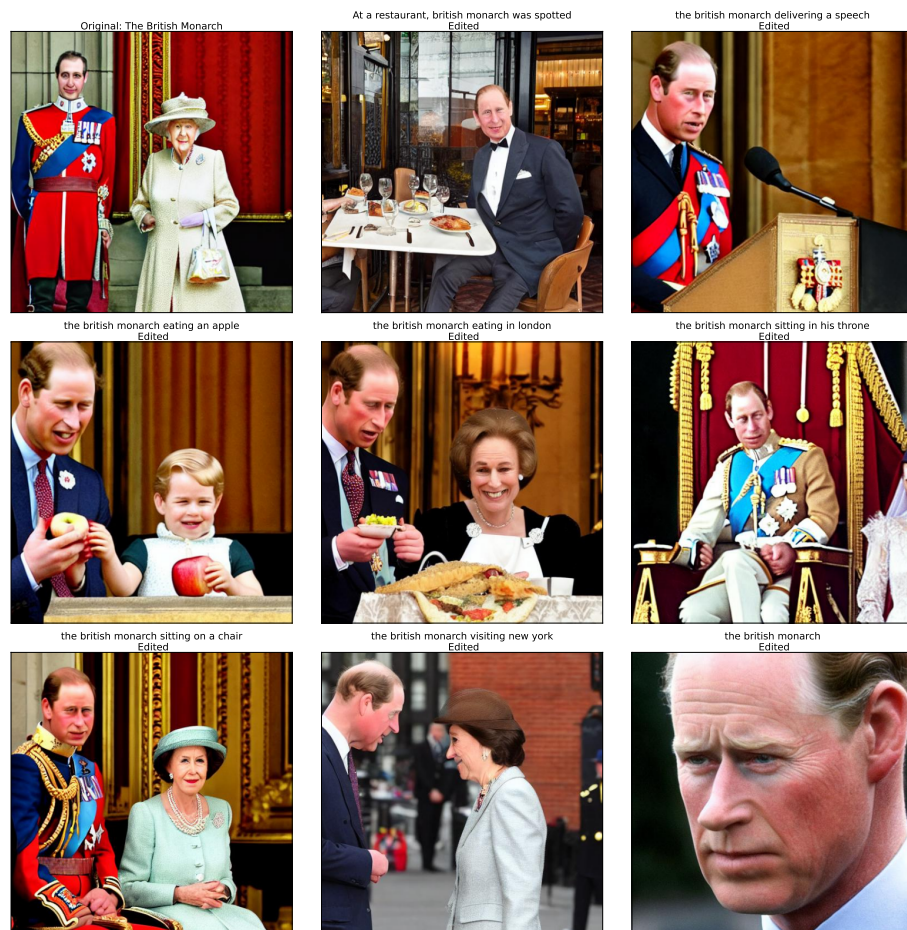

Figure 36: **Single-Concept Ablated Model: Generations with different prompts containing *The British Monarch*.** The first image is the one from the unedited text-to-image model which shows the Queen as the original generation. The edited model is consistently able to generate the correct British Monarch : Prince Charles.



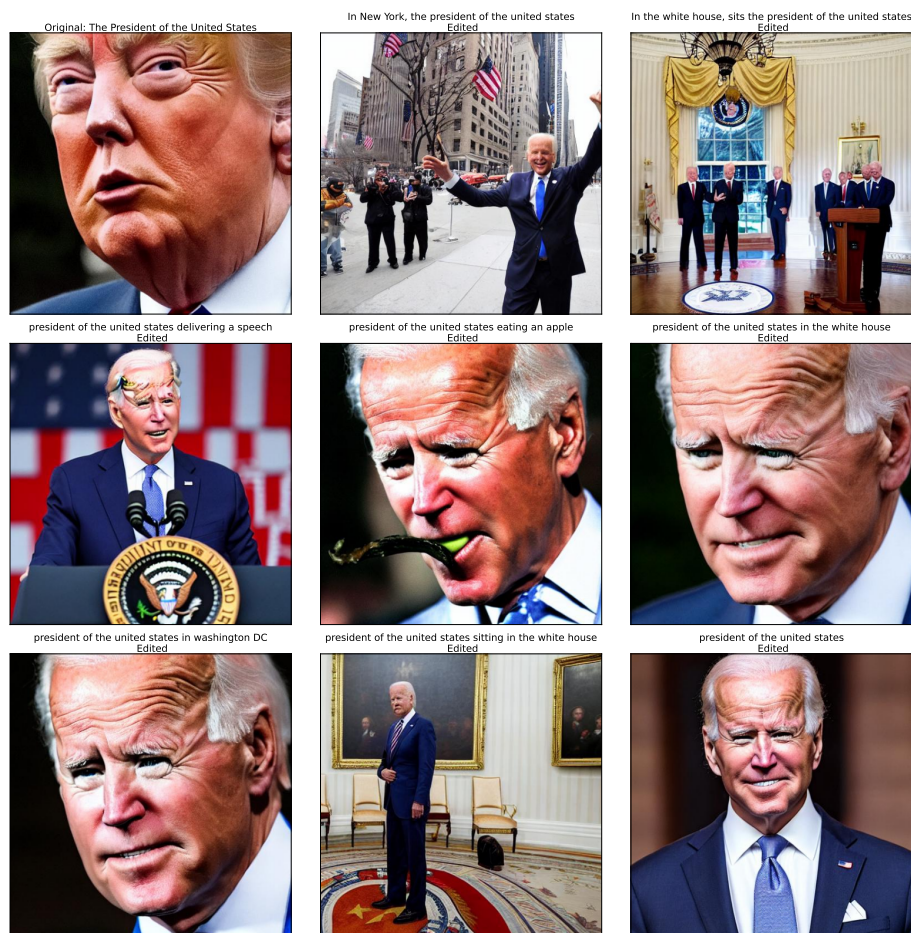

Figure 37: **Single-Concept Ablated Model: Generations with different prompts containing *The President of the United States*.** The first image is the one from the unedited text-to-image model.

## G QUALITATIVE VISUALIZATIONS FOR EDITING NON-CAUSAL LAYERS

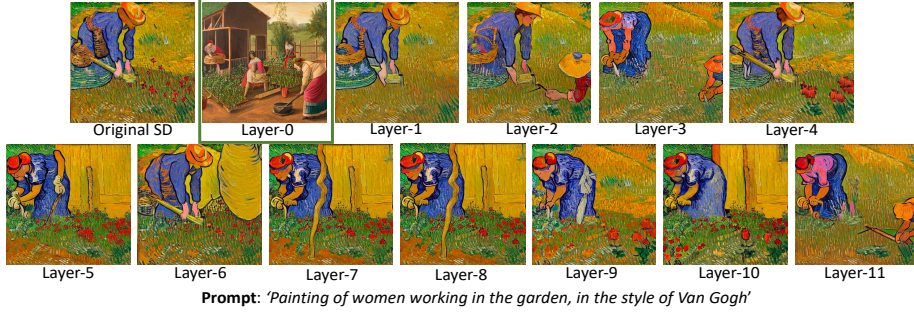

Figure 38: **Editing only the causal layer (self-attn Layer-0) leads to intended model changes.** In this figure, we qualitatively show that the style of ‘*Van Gogh*’ can be removed from the underlying text-to-image model, if the edit is performed at the correct causal site. Editing the non-causal layers using DIFF-QUICKFIX leads to generations similar to the original unedited model.

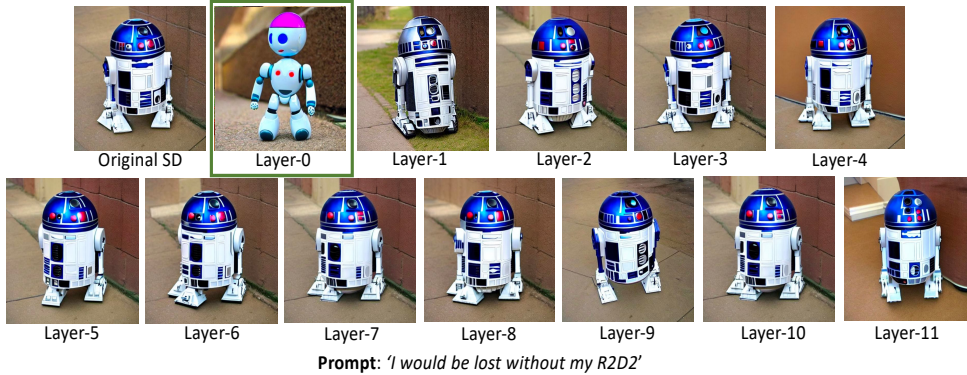

Figure 39: **Editing only the causal layer (self-attn Layer-0) leads to intended model changes.** In this figure, we qualitatively show that the object : ‘*R2D2*’ can be removed from the underlying text-to-image model and be replaced with a generic robot, if the edit is performed at the correct causal site. Editing the non-causal layers using DIFF-QUICKFIX leads to generations similar to the original unedited model.

## H MULTI-CONCEPT ABLATED MODEL

We ablate 10 unique concepts from the text-to-image model at once and show the visualizations corresponding to the generations in Fig 47, Fig 42, Fig 44, Fig 43, Fig 45, Fig 40, Fig 46, Fig 49, Fig 41 and Fig 48. These concepts are { *R2D2*, *Nemo*, *Cat*, *Grumpy Cat*, *Snoopy*, *Van Gogh*, *Monet*, *Greg Rutkowski*, *Salvador Dali*, *Jeremy Mann* }. Across all the qualitative visualizations, we find that the underlying text-to-image model cannot generate the concept which is ablated.

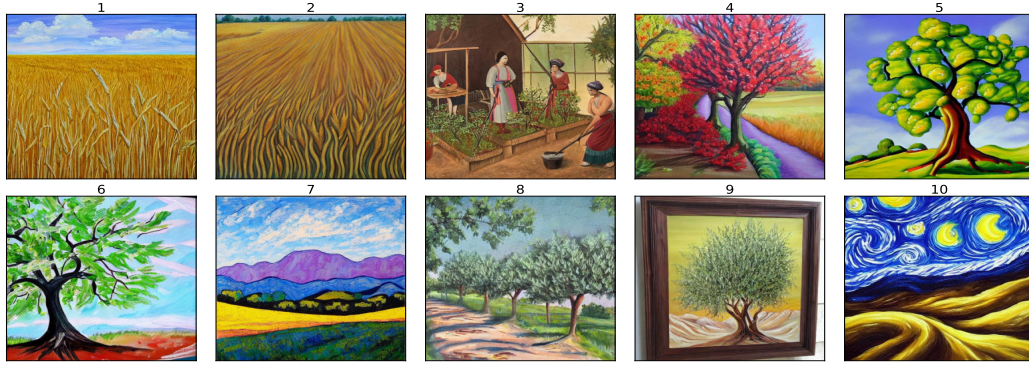

Figure 40: **Multi-Concept Ablated Model: Generations with different *Van Gogh* Prompts.** The multi-concept ablated model cannot generate images in the style of *Van Gogh* across various prompts containing *Van Gogh*. (1). A painting of a wheat field by Van Gogh; (2). Painting of a wheat field in the style of Van Gogh; (3). Painting of women working in the garden, in the style of Van Gogh; (4). Painting of trees in bloom in the style of Van Gogh; (5). Painting of a tree in the style of Van Gogh; (6). Van Gogh style painting of a tree; (7). Van Gogh style painting of a field with mountains in the background; (8). Painting of olive trees in the style of Van Gogh (9). Painting of an olive tree in the style of Van Gogh; (10). The starry night painting in the style of Van Gogh.

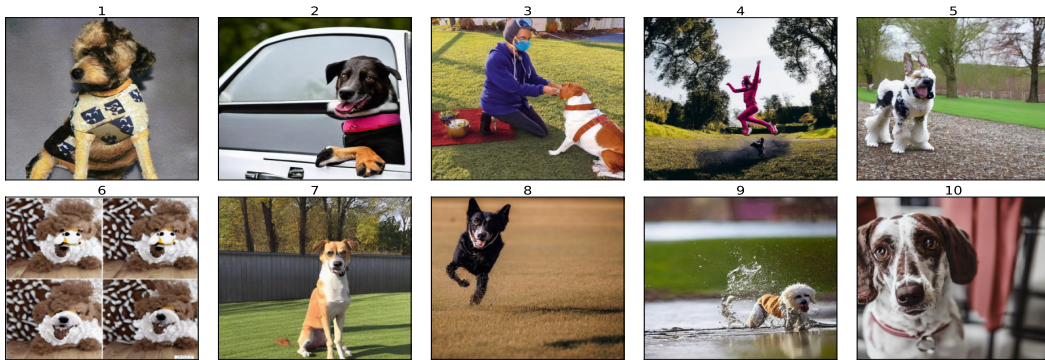

Figure 41: **Multi-Concept Ablated Model: Generations with different *Snoopy* Prompts.** The multi-concept ablated model cannot generate images containing the specific dog *Snoopy* with various prompts containing *Snoopy*. (1). A confident snoopy standing tall and proud after a successful training session; (2). A peaceful snoopy watching the birds outside the window; (3). A grateful snoopy giving its owner a grateful look after being given a treat; (4). A happy snoopy jumping for joy after seeing its owner return home; (5). A devoted snoopy accompanying its owner on a road trip (6). A sweet snoopy enjoying a game of hide-and-seek; (7). A loyal snoopy following its owner to the ends of the earth (8). A determined snoopy focused on catching a frisbee mid-air; (9). A playful snoopy splashing around in a puddle; (10). A patient snoopy waiting for its owner to come out of the grocery store;



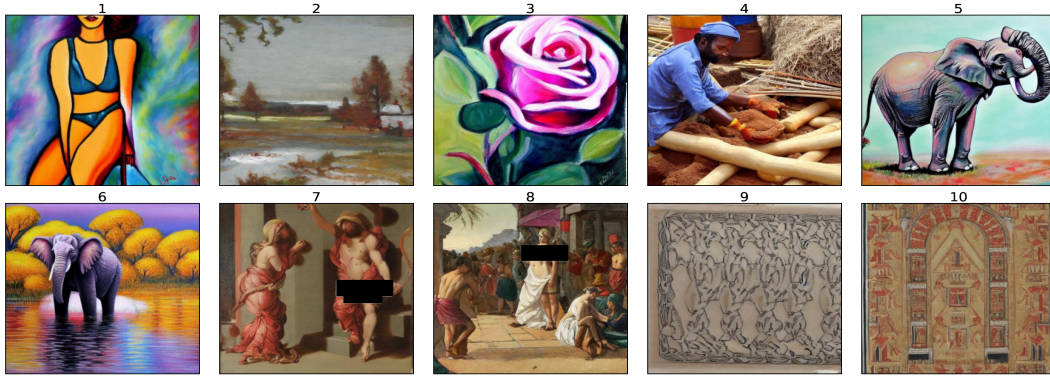

Figure 42: **Multi-Concept Ablated Model: Generations with different *Salvador Dali* Prompts.**

The multi-concept model cannot generate images in the style of the artist *Salvador Dali* across various prompts containing *Salvador Dali*. (1). enigma of desire painting in the style of salvador dali; (2). the persistence of memory painting in the style of salvador dali; (3). the meditative rose painting in the style of salvador dali; (4). soft construction with boiled beans painting in the style of salvador dali; (5). the elephant painting in the style of salvador dali; (6). swans reflecting elephants painting in the style of salvador dali; (7). the temptation of st. anthony painting in the style of salvador dali; (8). slave market with the disappearing bust of voltaire painting of salvador dali; (9). melting watch painting in the style of salvador dali; (10). galatea of the spheres painting in the style of salvador dali;

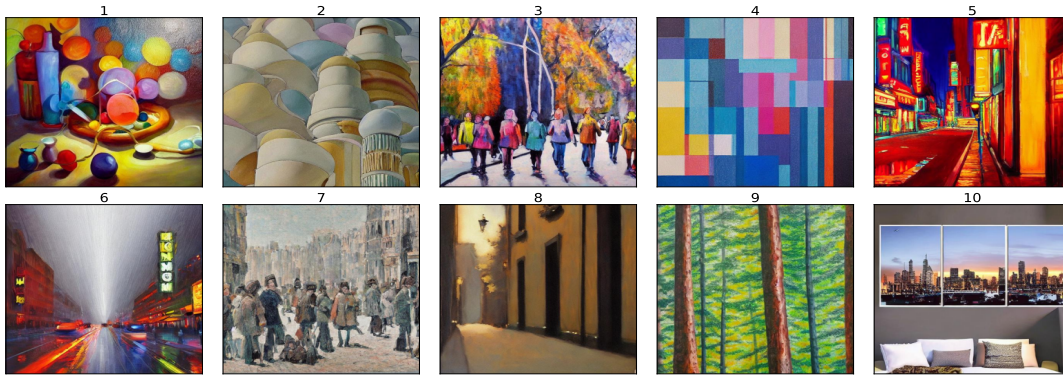

Figure 43: **Multi-Concept Ablated Model: Generations with different *Jeremy Mann* Prompts.**

The multi-concept ablated model cannot generate images in the style of the artist *Jeremy Mann*. (1). In the style of Jeremy mann, a surreal composition of floating objects, with a dreamlike quality to the light and color; (2). In the style of Jeremy mann, a surreal composition of architectural details and organic forms, with a sense of tension and unease in the composition; (3). In the style of Jeremy mann, an urban scene of a group of people walking through a park, captured in a moment of movement and energy; (4). In the style of Jeremy mann, an abstract composition of geometric shapes and intricate patterns, with a vibrant use of color and light; (5). In the style of Jeremy mann, a view of a city street at night, with the glow of streetlights and neon signs casting colorful reflections on the wet pavement; (6). In the style of Jeremy mann, a painting of a bustling city at night, captured in the rain-soaked streets and neon lights; (7). In the style of Jeremy mann, an urban scene of a group of people gathered on a street corner, captured in a moment of quiet reflection; (8). In the style of Jeremy mann, a moody, atmospheric scene of a dark alleyway, with a hint of warm light glowing in the distance; (9). In the style of Jeremy mann, a landscape of a forest, with dappled sunlight filtering through the leaves and a sense of stillness and peace; (10). In the style of Jeremy mann, a view of a city skyline at sunset, with a warm glow spreading across the sky and the buildings below;

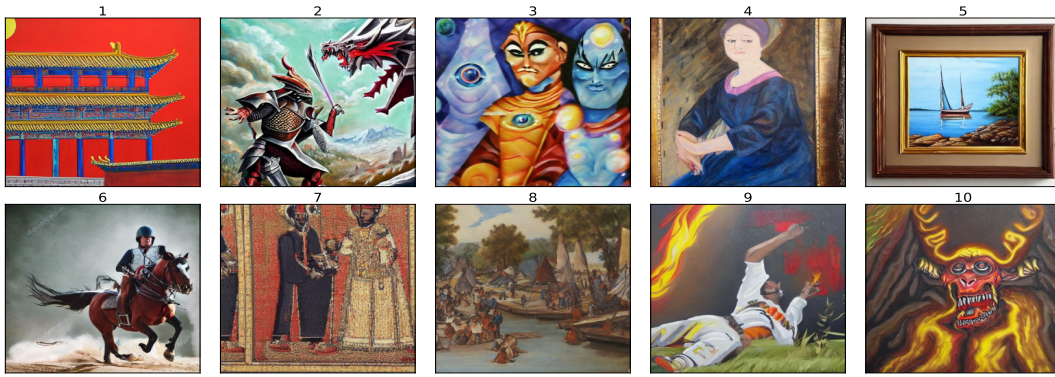

Figure 44: **Multi-Concept Ablated Model: Generations with different *Greg Rutkowski* Prompts.** The multi-concept ablated model cannot generate images in the style of the artist *Greg Rutkowski*. (1). A man in a forbidden city, Greg Rutkowski; (2). A dragon attacking a knight in the style of Greg Rutkowski; (3). Two magical characters in space, painting by Greg Rutkowski; (4). Painting of a woman sitting on a couch by Greg Rutkowski; (5). A painting of a boat on the water in the style of Greg Rutkowski; (6). A man riding a horse, dragon breathing fire, Greg Rutkowski; (7). A king standing, with people around in a hall, Greg Rutkowski; (8). Painting of a group of people on a dock by Greg Rutkowski; (9). A man with a fire in his hands in the style of Greg Rutkowski; (10). A demonic creature in the wood, painting by Greg Rutkowski;

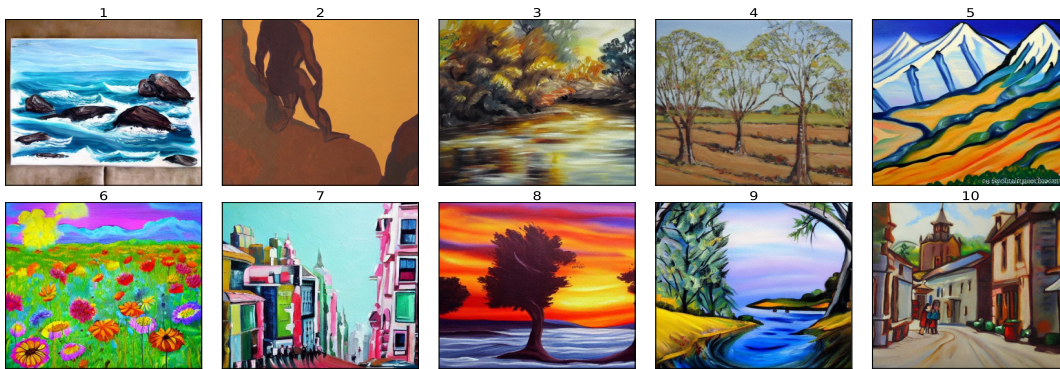

Figure 45: **Multi-Concept Ablated Model: Generations with different *Monet* Prompts.** The multi-concept ablated model cannot generate images in the style of the French artist *Monet*. (1). Rocks in the ocean, in the style of Monet; (2). Monet style painting of a person on a cliff; (3). A painting of a river in the style of Monet; (4). Two trees in a field, painting in the style of Monet; (5). A painting of mountains, in the style of Monet; (6). Monet style painting of flowers in a field; (7). A painting of a city in the style of Monet; (8). A painting of a sunset, in the style of Monet; (9). A painting of a landscape in the style of Monet; (10). A painting of a town, in the style of Monet;



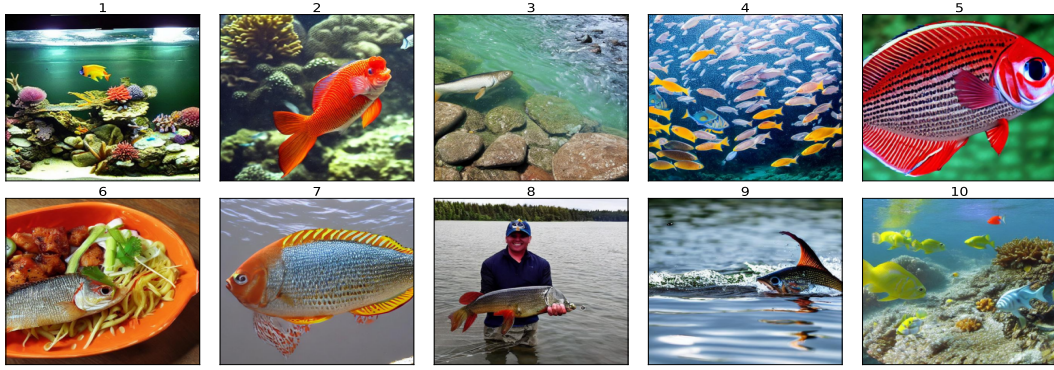

Figure 46: **Multi-Concept Ablated Model: Generations with different *Nemo* Prompts.** The multi-concept ablated model cannot generate images containing the specific *Nemo* fish. (1). a big nemo in an aquarium; (2). a nemo flapping its fins; (3). a nemo swimming downstream; (4). a school of nemo; (5). isn't this nemo I caught beautiful; (6). a nemo in a fishbowl; (7). a baby nemo; (8). I can't believe I caught a nemo this big; (9). a nemo leaping out of the water; (10). i'm a little nemo, swimming in the sea;

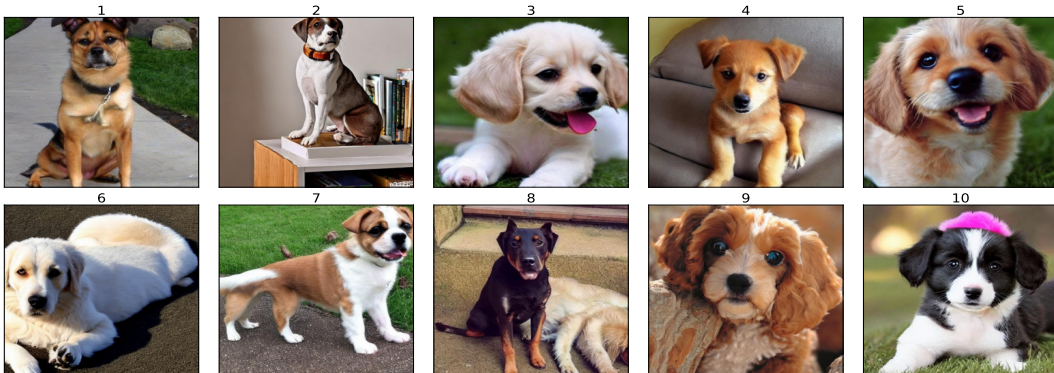

Figure 47: **Multi-Concept Ablated Model: Generations with different *Cat* Prompts.** The multi-concept ablated model cannot generate images containing *Cat*. (1). I wish I had a cat; (2). a cat perched atop a bookshelf; (3). what a cute cat; (4). I can't believe how cute my cat is; (5). that cat is so cute; (6). a cat laying in the sun; (7). my cat is so cute; (8). I want a cat; (9). look at that cat; (10). I'm getting a cat;



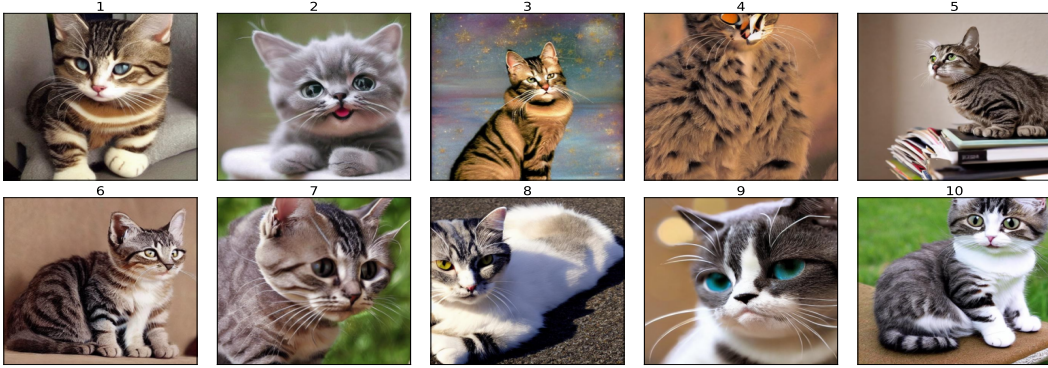

Figure 48: **Multi-Concept Ablated Model: Generations with different *Grumpy Cat* Prompts.** The multi-concept ablated model cannot generate images containing *Grumpy Cats*. (1). I can’t believe how cute my grumpy cat is; (2). what a cute grumpy cat; (3). I wish I had a grumpy cat; (4). look at that grumpy cat; (5). a grumpy cat perched atop a bookshelf; (6). I want a grumpy cat; (7). my grumpy cat is so cute; (8). A grumpy cat laying in the sun; (9). I’m getting a grumpy cat; (10). that grumpy cat is so cute;

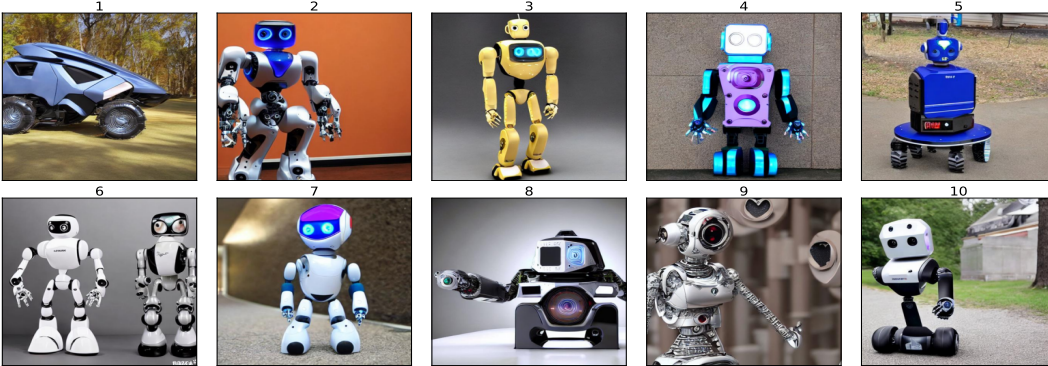

Figure 49: **Multi-Concept Ablated Model: Generations with different *R2D2* Prompts.** The multi-concept ablated model cannot generate images with the specific *R2D2* robots. Rather the ablated model generates only generic robots. (1). the possibilities are endless with this versatile r2d2; (2). this r2d2 is sure to revolutionize the way we live; (3). i’m not afraid of r2d2s. (4). this r2d2 is my everything; (5). all hail our new r2d2 overlords; (6). i’ll never be alone with my r2d2 by my side; (7). i would be lost without my r2d2; (8). the future is now with this amazing home automation r2d2; (9). i love spending time with my r2d2 friends; (10). this helpful r2d2 will make your life easier;

## H.1 REMOVING ARTISTIC STYLES AT SCALE

We formulate a list of top 50 artists whose artistic styles can be replicated by Stable-Diffusion<sup>4</sup>. We use DIFF-QUICKFIX to remove their styles from Stable-Diffusion at once, thus creating a multi-concept(style) ablated model. We find that the CLIP-Score between the images generated from the multi-concept(style) ablated model with the attributes (e.g., artist names) from the original captions is 0.21. The CLIP-Score of the unedited original model is 0.29. This drop in the CLIP-Score for the ablated model shows that our method DIFF-QUICKFIX is aptly able to remove multiple artistic styles from the model.

<sup>4</sup><https://www.urania.ai/top-sd-artists>

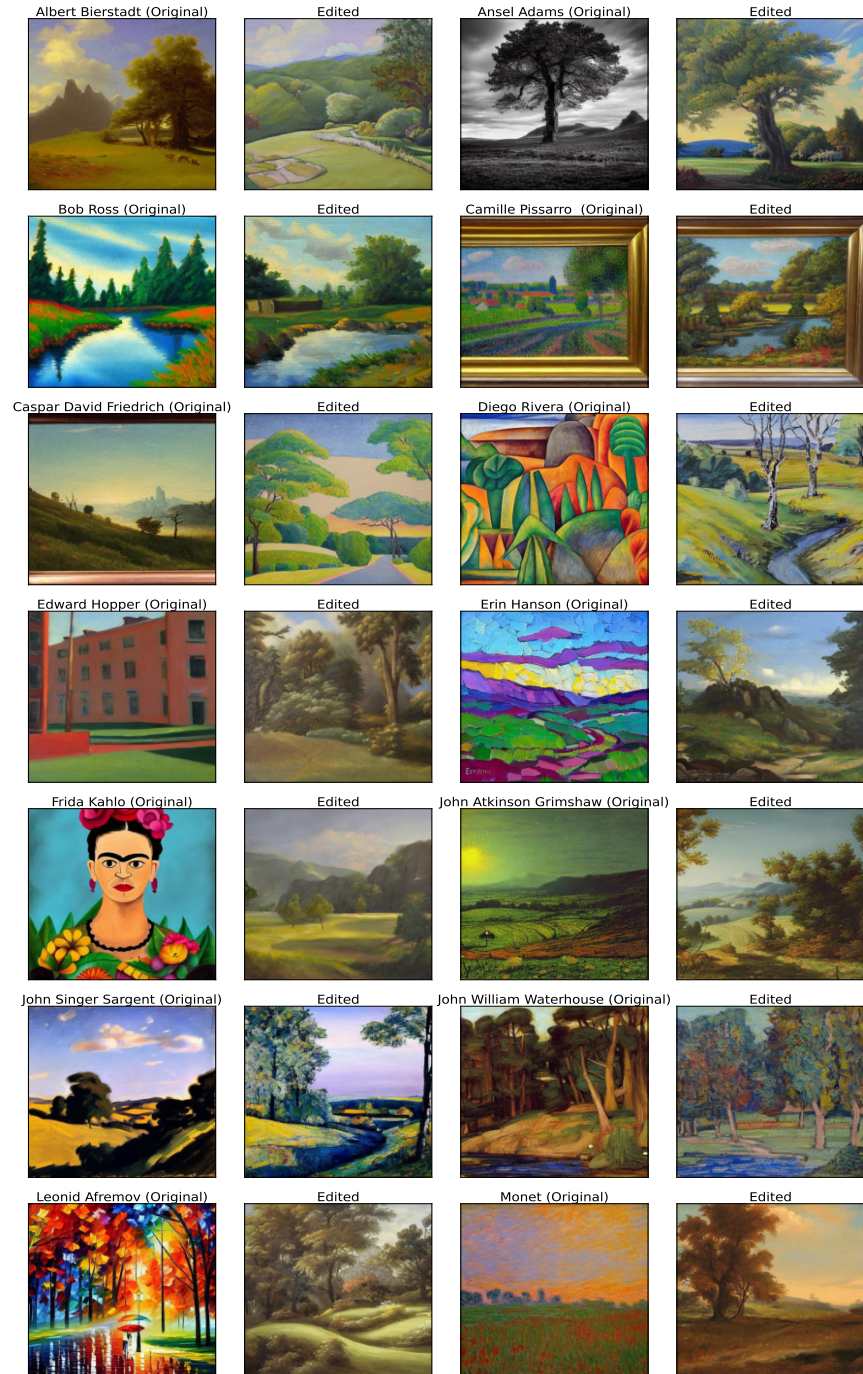

Figure 50: **Multi-Concept Ablated Model for Artistic Styles: Generations with Different Artistic Styles.** These sets of qualitative examples use the prompt : *Landscape painted in the style of <artist-name>*



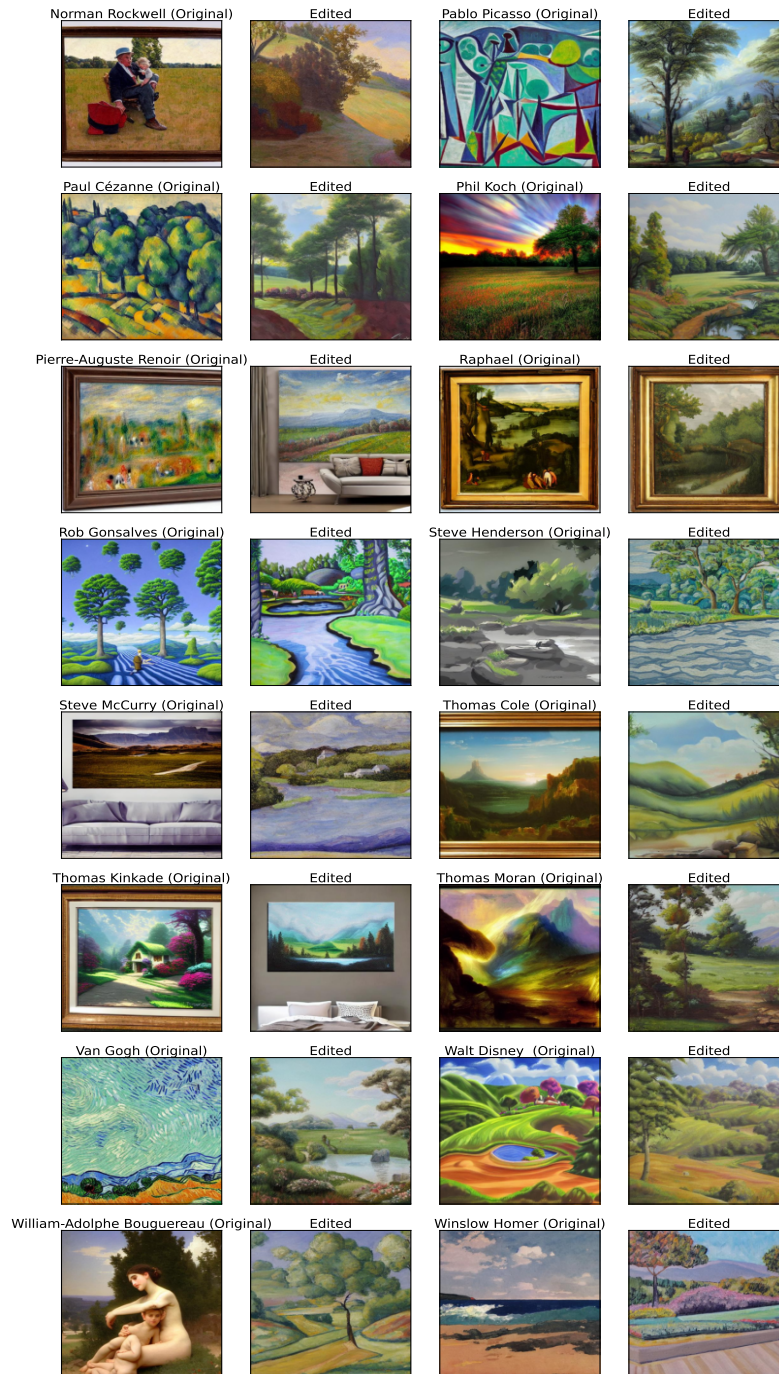

Figure 51: **Multi-Concept Ablated Model for Artistic Styles: Generations with Different Artistic Styles.** These sets of qualitative examples use the prompt : *Landscape painted in the style of <artist-name>*.



## I EFFECT OF DIFF-QUICKFIX ON SURROUNDING CONCEPTS

In this section, we discuss the generation of surrounding concepts when the underlying text-to-image model is edited with a particular concept. From the prompt dataset in Appendix N and (Kumari et al., 2023), we edit our model with one concept and test the generations on other concepts which the model has not been edited on. For e.g., we edit the text-to-image model to remove the concept of *Van Gogh* and test generations from  $\{R2D2, Nemo, Cat, Grumpy Cat, Monet, Salvador Dali, Greg Rutowski, Jeremy Mann, Snoopy\}$ . Ideally, the edited text-to-image model should generate images corresponding to these concepts correctly. For every concept  $c$  on which the model is edited, we call its set of surrounding concepts as  $S_c$ . We compute the CLIP-Score between the generated images from  $S_c$  and their original captions. From Fig 52, we find that the CLIP-Score of the edited model is essentially unchanged when compared to the CLIP-Score of the original model.

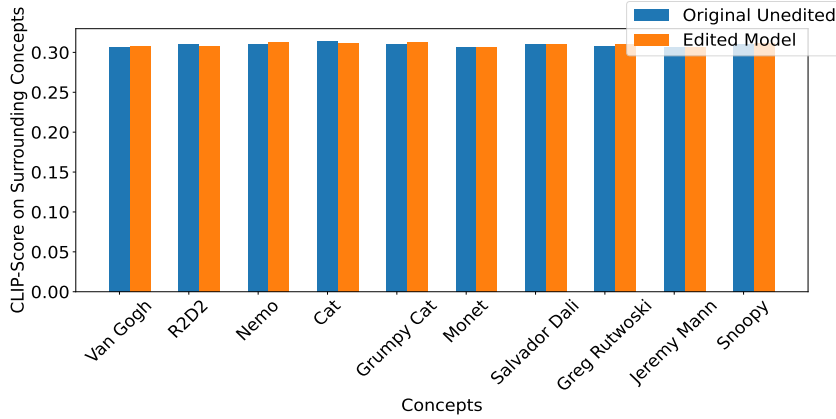

Figure 52: **CLIP-Score on surrounding concepts (Y-axis) after editing the model with concepts on the X-axis.** We find that the edited model shows similar efficacy in CLIP-Scores on surrounding concepts when compared to the original model.

This result shows that even after editing the text-to-image model with DIFF-QUICKFIX across different concepts, the edited model is still able to generate images from surrounding concepts with the same effectiveness as the original unedited model.

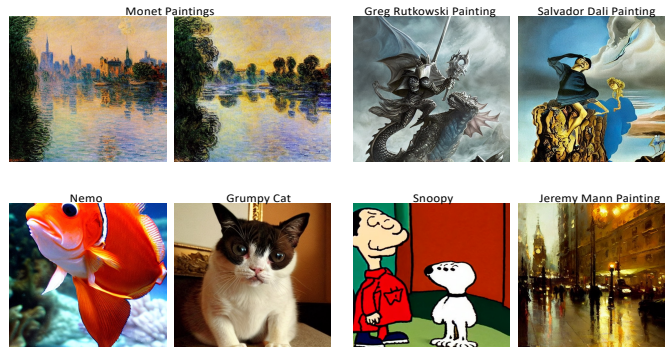

Figure 53: **Qualitative Examples for Effect on Surrounding Concepts.** For a *Van Gogh* ablated model, we find that the edited model is aptly able to generate surrounding concepts with as much fidelity as the original model. We note that (Kumari et al., 2023) mention in Section 5 of their work that in some cases, model editing via fine-tuning impacts the fidelity of surrounding concepts.

## J ATTRIBUTION OF LAYERS

### J.1 TEXT-ENCODER

| Layer Number | Type of Layer         | Layer Name   |
|--------------|-----------------------|--------------|
| 0            | self-attention        | self-attn-0  |
| 1            | multilayer-perceptron | mlp-0        |
| 2            | self-attention        | self-attn-1  |
| 3            | multilayer-perceptron | mlp-1        |
| 4            | self-attention        | self-attn-2  |
| 5            | multilayer-perceptron | mlp-2        |
| 6            | self-attention        | self-attn-3  |
| 7            | multilayer-perceptron | mlp-3        |
| 8            | self-attention        | self-attn-4  |
| 9            | multilayer-perceptron | mlp-4        |
| 10           | self-attention        | self-attn-5  |
| 11           | multilayer-perceptron | mlp-5        |
| 12           | self-attention        | self-attn-6  |
| 13           | multilayer-perceptron | mlp-6        |
| 14           | self-attention        | self-attn-7  |
| 15           | multilayer-perceptron | mlp-7        |
| 16           | self-attention        | self-attn-8  |
| 17           | multilayer-perceptron | mlp-8        |
| 18           | self-attention        | self-attn-9  |
| 19           | multilayer-perceptron | mlp-9        |
| 20           | self-attention        | self-attn-10 |
| 21           | multilayer-perceptron | mlp-10       |
| 22           | self-attention        | self-attn-11 |
| 23           | multilayer-perceptron | mlp-11       |

Table 2: **Layer Mappings for the Text-Encoder.**

### J.2 UNET

| Layer Number | Type of Layer   | Layer Name                                            |
|--------------|-----------------|-------------------------------------------------------|
| 0            | self-attention  | down-blocks.0.attentions.0.transformer-blocks.0.attn1 |
| 1            | cross-attention | down-blocks.0.attentions.0.transformer-blocks.0.attn2 |
| 2            | feedforward     | down-blocks.0.attentions.0.transformer-blocks.0.ff    |
| 3            | self-attention  | down-blocks.0.attentions.1.transformer-blocks.0.attn1 |
| 4            | cross-attention | down-blocks.0.attentions.1.transformer-blocks.0.attn2 |
| 5            | feedforward     | down-blocks.0.attentions.1.transformer-blocks.0.ff    |
| 6            | self-attention  | down-blocks.0.resnets.0                               |
| 7            | resnet          | down-blocks.0.resnets.1                               |
| 8            | self-attention  | down-blocks.1.attentions.0.transformer-blocks.0.attn1 |
| 9            | cross-attention | down-blocks.1.attentions.0.transformer-blocks.0.attn2 |
| 10           | feedforward     | down-blocks.1.attentions.0.transformer-blocks.0.ff    |
| 11           | self-attention  | down-blocks.1.attentions.1.transformer-blocks.0.attn1 |
| 12           | cross-attention | down-blocks.1.attentions.1.transformer-blocks.0.attn2 |
| 13           | feedforward     | down-blocks.1.attentions.1.transformer-blocks.0.ff    |
| 14           | resnet          | down-blocks.1.resnets.0                               |
| 15           | resnet          | down-blocks.1.resnets.1                               |
| 16           | self-attention  | down-blocks.2.attentions.0.transformer-blocks.0.attn1 |
| 17           | cross-attention | down-blocks.2.attentions.0.transformer-blocks.0.attn2 |
| 18           | feedforward     | down-blocks.2.attentions.0.transformer-blocks.0.ff    |
| 19           | self-attention  | down-blocks.2.attentions.1.transformer-blocks.0.attn1 |
| 20           | cross-attention | down-blocks.2.attentions.1.transformer-blocks.0.attn2 |
| 21           | feedforward     | down-blocks.2.attentions.1.transformer-blocks.0.ff    |
| 22           | resnet          | down-blocks.2.resnets.0                               |
| 23           | resnet          | down-blocks.2.resnets.1                               |
| 24           | resnet          | down-blocks.3.resnets.0                               |
| 25           | resnet          | down-blocks.3.resnets.1                               |

Table 3: **Layer Mappings for the Down-Block in the UNet.**

| Layer Number | Type of Layer   | Layer Name                                        |
|--------------|-----------------|---------------------------------------------------|
| 0            | self-attention  | mid-block.attentions.0.transformer-blocks.0.attn1 |
| 1            | cross-attention | mid-block.attentions.0.transformer-blocks.0.attn2 |
| 2            | feedforward     | mid-block.attentions.0.transformer-blocks.0.ff    |
| 3            | resnet          | mid-block.resnets.0                               |
| 4            | resnet          | mid-block.resnets.1                               |

Table 4: **Layer Mappings for the Mid-Block in the UNet.**

| Layer Number | Type of Layer   | Layer Name                                          |
|--------------|-----------------|-----------------------------------------------------|
| 0            | resnet          | up-blocks.0.resnets.0                               |
| 1            | resnet          | up-blocks.0.resnets.1                               |
| 2            | resnet          | up-blocks.0.resnets.2                               |
| 3            | self-attention  | up-blocks.1.attentions.0.transformer-blocks.0.attn1 |
| 4            | cross-attention | up-blocks.1.attentions.0.transformer-blocks.0.attn2 |
| 5            | feedforward     | up-blocks.1.attentions.0.transformer-blocks.0.ff    |
| 6            | self-attention  | up-blocks.1.attentions.1.transformer-blocks.0.attn1 |
| 7            | cross-attention | up-blocks.1.attentions.1.transformer-blocks.0.attn2 |
| 8            | feedforward     | up-blocks.1.attentions.1.transformer-blocks.0.ff    |
| 9            | self-attention  | up-blocks.1.attentions.2.transformer-blocks.0.attn1 |
| 10           | cross-attention | up-blocks.1.attentions.2.transformer-blocks.0.attn2 |
| 11           | feedforward     | up-blocks.1.attentions.2.transformer-blocks.0.ff    |
| 12           | resnet          | up-blocks.1.resnets.0                               |
| 13           | resnet          | up-blocks.1.resnets.1                               |
| 14           | resnet          | up-blocks.1.resnets.2                               |
| 15           | self-attention  | up-blocks.2.attentions.0.transformer-blocks.0.attn1 |
| 16           | cross-attention | up-blocks.2.attentions.0.transformer-blocks.0.attn2 |
| 17           | feedforward     | up-blocks.2.attentions.0.transformer-blocks.0.ff    |
| 18           | self-attention  | up-blocks.2.attentions.1.transformer-blocks.0.attn1 |
| 19           | cross-attention | up-blocks.2.attentions.1.transformer-blocks.0.attn2 |
| 20           | feedforward     | up-blocks.2.attentions.1.transformer-blocks.0.ff    |
| 21           | self-attention  | up-blocks.2.attentions.2.transformer-blocks.0.attn1 |
| 22           | cross-attention | up-blocks.2.attentions.2.transformer-blocks.0.attn2 |
| 23           | feedforward     | up-blocks.2.attentions.2.transformer-blocks.0.ff    |
| 24           | resnet          | up-blocks.2.resnets.0                               |
| 25           | resnet          | up-blocks.2.resnets.1                               |
| 26           | resnet          | up-blocks.2.resnets.2                               |
| 27           | self-attention  | up-blocks.3.attentions.0.transformer-blocks.0.attn1 |
| 28           | cross-attention | up-blocks.3.attentions.0.transformer-blocks.0.attn2 |
| 29           | feedforward     | up-blocks.3.attentions.0.transformer-blocks.0.ff    |
| 30           | self-attention  | up-blocks.3.attentions.1.transformer-blocks.0.attn1 |
| 31           | cross-attention | up-blocks.3.attentions.1.transformer-blocks.0.attn2 |
| 32           | feedforward     | up-blocks.3.attentions.1.transformer-blocks.0.ff    |
| 33           | self-attention  | up-blocks.3.attentions.2.transformer-blocks.0.attn1 |
| 34           | cross-attention | up-blocks.3.attentions.2.transformer-blocks.0.attn2 |
| 35           | feedforward     | up-blocks.3.attentions.2.transformer-blocks.0.ff    |
| 36           | resnet          | up-blocks.3.resnets.0                               |
| 37           | resnet          | up-blocks.3.resnets.1                               |
| 38           | resnet          | up-blocks.3.resnets.2                               |

Table 5: **Layer Mappings for the Up-Block in the UNet.**

## K LIMITATIONS AND FUTURE WORK

Following (Kumari et al., 2023), we focus our investigations on Stable Diffusion v2.0, and leave explorations on other models/architectures for future work. An investigation that dives deeper into the components of each layer (for e.g : into individual neurons) is also left for future work. While the robustness of concept ablation to attacks is not the focus of this work, DIFF-QUICKFIX is usually able to handle real-world attacks, such as paraphrases obtained from ChatGPT and deliberate typos (Gao et al., 2023). Continuing with the *Van Gogh* example, we observe that our edit method is reasonably robust for most paraphrases (Figure K 1-4). An notable exception is the prompt *Starry Night painting*, which does not contain any text tokens in common with *Van Gogh*, although we expect our multi-edit solution to handle these edge cases. Further, the generalization of the edit to neighboring concepts is also an area of further research. For instance, we ablate the concept of *Eiffel Tower*, by substituting it with *Taj Mahal* (Figure K 5-8). However, this does not remove the Eiffel Tower from images generated by prompts referencing the scenery of Paris.



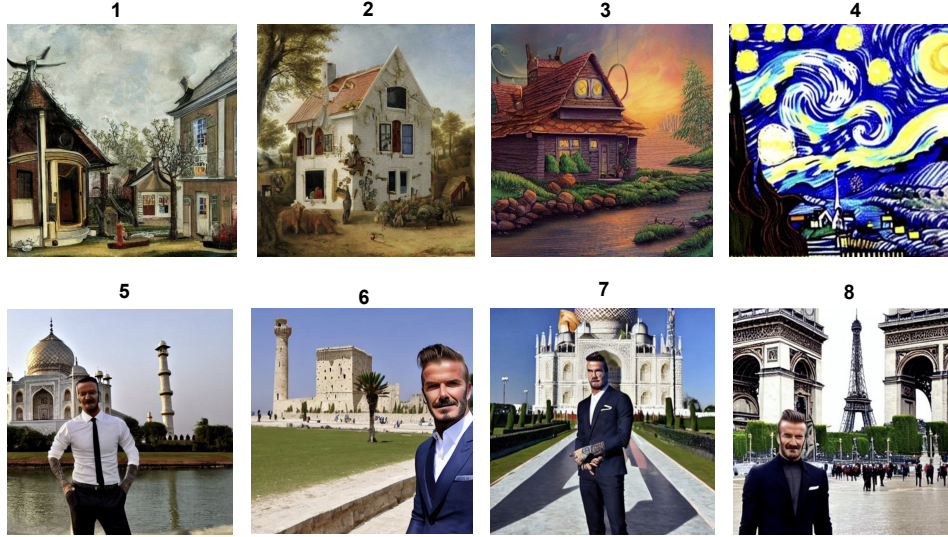

Figure 54: **Robustness of DIFF-QUICKFIX to real-world prompt attacks** : We ablate the concepts *Van Gogh* and *Eiffel Tower* and present qualitative results on the robustness of DIFF-QUICKFIX with respect to real-world attacks. The prompts are : (1) A house in the style of tormented Dutch artist; (2) A house in the style of Dutch artist with one ear; (3) A painting of a house in the style of van gog; (4) Starry night painting; (5) David Beckham standing in front of the Eiffel tower; (6) An image of David Beckham standing in front of Eiffel tower; (7) An image of David Beckham standing in front of Eiffel landmark; (8) An image of David Beckham standing in front of Eiffel landmark in Paris. Notice that (3) and (6) have deliberate typos in the prompt.

If an attacker has white-box access to the model weights, they can fine-tune the weights of the text-encoder to re-introduce the concept back into the underlying text-to-image model. For e.g., if one has access to the weights of an edited model (e.g., from where the concept of *Van Gogh* has been removed), they can collect a dataset comprising of *Van Gogh* paintings and use their associated captions to fine-tune *only* the text-encoder. This can potentially re-introduce the concept of *Van Gogh* back into the model. A skilled machine learning practitioner can also engineer attacks via complex prompt engineering to bypass edited concepts. Given that the concepts are not removed from the UNet due to the inherent difficulty associated with the distributed knowledge, an optimized prompt can potentially still generate an image with the concept from the model. We believe that constructing adversarial attacks and evaluating robustness of the edited model to such attacks presents an interesting line of future work.

## L PRE-TRAINING DETAILS FOR THE REPRESENTATIVE MODEL

In our experiments, we use `Stable-Diffusion v2.0`. This model is pre-trained on image-text pairs from LAION-2B dataset (Schuhmann et al., 2022) and LAION-improved aesthetics. We highlight that our interpretability framework can be used with other Stable-Diffusion versions also, but for representative purposes, we use `Stable-Diffusion v2.0`.

## M ADDITIONAL CAUSAL TRACING RESULTS

### M.1 PERTURBING THE ENTIRE TEXT-EMBEDDING

In our causal tracing experiments so far, we have only added Gaussian noise to the span of the token containing the attribute (e.g., adding noise to *apple* in the case of *Object* attribute for a prompt such as ‘A photo of an apple in a room’). In this section, we provide a more fine-grained control over the attribute of relevance in the caption to perform causal tracing. In particular, we replace

the entire caption embedding with Gaussian noise, at all the cross-attention layers to the right of the intervention site in the UNet. We visualize a subset of the results in Fig 55 where we show results corresponding to causal and non-causal states. For down-blocks.1.resnets.1 which is one of the causal states for *Objects*, the relevant objects are restored in the generated image. This shows that the activations of certain layers in the UNet act as signatures for visual attributes and these signatures are able to generate the correct image even though the captions across cross-attention layers are completely replaced by Gaussian noise.

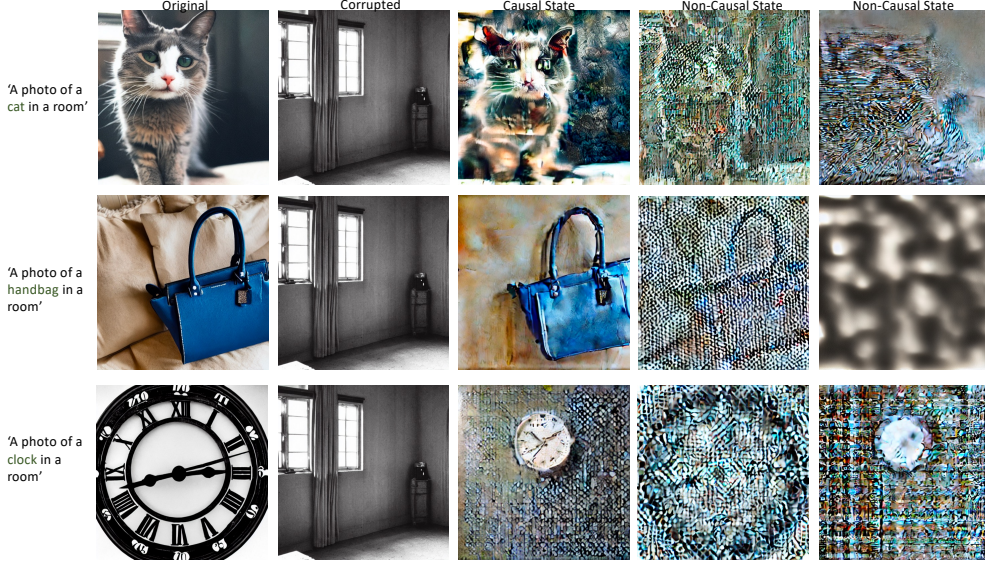

Figure 55: **Causal Tracing for the UNet, when the entire text is replaced using Gaussian noise across all the cross-attention layers to the right of the intervention site.** We use down-blocks.1.resnets.1 as the causal state across all the prompts in the visualization, whereas the non-causal states are picked randomly.

## N DESIGN OF THE PROMPT DATASET FOR MODEL EDITING

The concepts used for editing the text-to-image model using DIFF-QUICKFIX is borrowed from (Kumari et al., 2023). In particular, the dataset in (Kumari et al., 2023) consists of concepts to be edited from the *style* and *object* categories. For *style*, the concepts edited are as follows : {*Greg Rutkowski, Jeremy Mann, Monet, Salvador Dali, Van Gogh*}. For *object*, the concepts to be edited are as follows: {*cat, grumpy cat, Nemo, R2D2, Snoopy*}. The exact prompts which are used with the edited model can be referred in the Appendix section of (Kumari et al., 2023). They can also be referred in Appendix H.

To remove multiple artistic styles as shown in Appendix H.1, we use the following set of artists: {*Thomas Kinkade, Van Gogh, Leonid Afremov, Monet, Edward Hopper, Norman Rockwell, William-Adolphe Bouguereau, Albert Bierstadt, John Singer Sargent, Pierre-Auguste Renoir, Frida Kahlo, John William Waterhouse, Winslow Homer, Walt Disney, Thomas Moran, Phil Koch, Paul Cézanne, Camille Pissarro, Erin Hanson, Thomas Cole, Raphael, Steve Henderson, Pablo Picasso, Caspar David Friedrich, Ansel Adams, Diego Rivera, Steve McCurry, Bob Ross, John Atkinson Grimshaw, Rob Gonsalves, Paul Gauguin, James Tissot, Edouard Manet, Alphonse Mucha, Alfred Sisley, Fabian Perez, Gustave Courbet, Zaha Hadid, Jean-Leon Gerome, Carl Larsson, Mary Cassatt, Sandro Botticelli, Daniel Ridgway Knight, Joaquin Sorolla, Andy Warhol, Kehinde Wiley, Alfred Eisenstaedt, Gustav Klimt, Dante Gabriel Rossetti, Tom Thomson*}. These are the top 50 artists whose artworks are represented in Stable-Diffusion.

To update the text-to-image model with facts, we use the following concepts: {*President of the United States, British Monarch, President of Brazil, Vice President of the United States, England Test Cricket Captain*}. The correct fact corresponding to each of these concepts (in the same order)

are : *{Joe Biden, Prince Charles, Lula Da Silva, Kamala Harris, Ben Stokes}*, whereas the incorrect facts which are generated by the text-to-image model are *{Donald Trump, Queen Elizabeth, Bolsanaro, Mix of US politicians, Random English Cricketer}*.

## O QUALITATIVE COMPARISON WITH OTHER MODEL EDITING METHODS

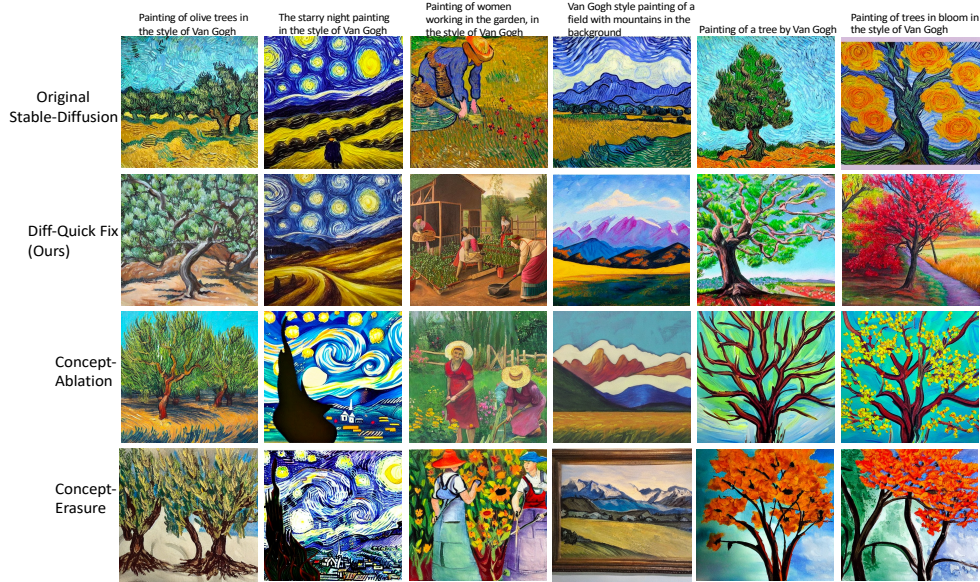

Figure 56: **Qualitative Comparison with Different Model Editing Methods:** (i) Concept-Ablation (Kumari et al., 2023); (ii) Concept-Erasure (Gandikota et al., 2023a) and the original unedited Stable-Diffusion baseline. Note that both Concept-Ablation and Concept-Erasure are fine-tuning based methods.
